1  
2  
3  
4  
5  
6  
7  
8  
9  
10  
11  
12  
13  
14  
15  
16  
17  
18  
19  
20  
21  
22  
23  
24  
25  
26  
27  
28  
29  
30

**The Evolution of SlyA/RovA Transcription Factors  
From Repressors to Counter-Silencers in *Enterobacteriaceae***

W. Ryan Will<sup>1</sup>, Peter Brzovic<sup>2</sup>, Isolde Le Trong<sup>3</sup>, Ronald E. Stenkamp<sup>2,3</sup>,  
Matthew B. Lawrenz<sup>4</sup>, Joyce E. Karlinsey<sup>5</sup>, William W. Navarre<sup>5\*</sup>, Kara Main-Hester<sup>5</sup>, Virginia  
L. Miller<sup>6</sup>, Stephen J. Libby<sup>1†</sup> and Ferric C. Fang<sup>1,5#†</sup>

Departments of <sup>1</sup>Laboratory Medicine, <sup>2</sup>Biochemistry, <sup>3</sup>Biological Structure and <sup>5</sup>Microbiology,  
University of Washington, Seattle, WA 98195

<sup>4</sup>Department of Microbiology and Immunology and the Center for Predictive Medicine for  
Biodefense and Emerging Infectious Diseases, University of Louisville School of Medicine,  
Louisville, KY 40202

<sup>6</sup>Departments of Microbiology and Immunology, and Genetics, University of North Carolina  
School of Medicine, Chapel Hill, NC 27599

\*Present address, University of Toronto, ON, Canada M5S 1A8

#Corresponding author. E-mail address: [fcfang@uw.edu](mailto:fcfang@uw.edu)

†Contributed equally to this paper

31 **Abstract**

32           Gene duplication and subsequent evolutionary divergence have allowed conserved proteins  
33 to develop unique roles. The MarR family of transcription factors (TFs) has undergone extensive  
34 duplication and diversification in bacteria, where they act as environmentally-responsive  
35 repressors of genes encoding efflux pumps that confer resistance to xenobiotics, including many  
36 antimicrobial agents. We have performed structural, functional, and genetic analyses of  
37 representative members of the SlyA/RovA lineage of MarR TFs, which retain some ancestral  
38 functions, including repression of their own expression and that of divergently-transcribed multi-  
39 drug efflux pumps, as well as allosteric inhibition by aromatic carboxylate compounds. However,  
40 SlyA and RovA have acquired the ability to counter-silence horizontally-acquired genes, which  
41 has greatly facilitated the evolution of *Enterobacteriaceae* by horizontal gene transfer.  
42 SlyA/RovA TFs in different species have independently evolved novel regulatory circuits to  
43 provide the enhanced levels of expression required for their new role. Moreover, in contrast to  
44 MarR, SlyA is not responsive to copper. These observations demonstrate the ability of TFs to  
45 acquire new functions as a result of evolutionary divergence of both *cis*-regulatory sequences and  
46 *in trans* interactions with modulatory ligands.

## 47 **Introduction**

48           As organisms adapt to new or changing environments, their regulatory networks must  
49 evolve to ensure that individual genes are appropriately expressed in response to environmental  
50 signals (1). An important mechanism for the evolution of conserved essential proteins, including  
51 transcription factors (TFs), is gene duplication, which allows the subsequent diversification of  
52 gene and protein families and the development of new functions (2). More than 50% of bacterial  
53 genes are believed to have descended from original duplication events (3-5), providing a broad  
54 foundation from which bacteria can evolve complex and adaptive traits.

55           The MarR family is an ancient family of TFs, predating the divergence of archaea and  
56 bacteria (6). It has undergone extensive gene duplication events, with recent estimates suggesting  
57 that bacteria encode an average of seven MarR TFs per genome (7). MarR TFs typically function  
58 as environmentally-responsive repressors of genes encoding efflux pumps that export xenobiotics,  
59 including many antimicrobial agents, and are defined by the presence of a winged helix-turn-helix  
60 (wHTH) DNA-binding domain (8). The prototypical MarR protein of *Escherichia coli* represses a  
61 single operon, *marRAB*, which encodes a transcriptional activator (MarA) required for the  
62 expression of the AcrAB efflux pump, which in turn confers resistance to  $\beta$ -lactams, quinolones,  
63 and tetracyclines (9-11). MarR is allosterically regulated by many small molecules, in particular  
64 small aromatic carboxylate compounds such as salicylate, which induce a structural change that  
65 reduces the affinity of MarR for DNA (10, 12-14) and derepresses the expression of its cognate  
66 promoters. A recent study suggests that MarR can also be inhibited by intracellular copper ( $\text{Cu}^{2+}$ ),  
67 which oxidizes a conserved cysteine residue at position 80, promoting the formation of disulfide  
68 bonds between MarR dimers and causing individual dimers to dissociate from DNA (15). Free  
69 copper is thought to be liberated from membrane-bound cytoplasmic proteins during envelope

70 stress induced by antimicrobial agents. Dimerization of MarR TFs is required for DNA binding,  
71 as it allows these proteins to recognize palindromic sequences via the  $\alpha 4$  recognition helix, which  
72 makes sequence-specific contacts with the major groove, while the wing makes sequence-  
73 independent contacts via the minor groove (16).

74 A duplication event producing the SlyA lineage of MarR TFs most likely resulted from an  
75 ancient horizontal gene transfer event or from intragenomic recombination of a MarR family TF  
76 prior to the divergence of the *Enterobacteriaceae*. SlyA has been best characterized in *Salmonella*  
77 *enterica* serovar Typhimurium, where it serves primarily to upregulate virulence genes (17-19).  
78 Although this contrasts with the classical repressive role of MarR TFs, work in our and other  
79 laboratories has demonstrated that SlyA positively regulates genes by a counter-silencing  
80 mechanism, in which repression of AT-rich promoters by the histone-like nucleoid-associated  
81 protein H-NS is relieved by SlyA (17, 20). SlyA cooperatively remodels the H-NS-DNA complex  
82 in concert with the response regulator PhoP (20, 21), which is activated by conditions found within  
83 phagosomal compartments, including low  $Mg^{2+}$  (22), acidic pH (23), and cationic antimicrobial  
84 peptides (24). SlyA orthologs, represented by Hor, Rap, and RovA in *Pectobacterium* (*Erwinia*),  
85 *Serratia*, and *Yersinia*, respectively (25), are conserved in nearly every species of  
86 *Enterobacteriaceae*, even including endosymbionts such as *Sodalis glossinidius* (26), which have  
87 undergone extensive gene loss and degenerative evolution (27). This high degree of conservation  
88 suggests that the SlyA lineage occupies an essential role in the regulatory network organization of  
89 *Enterobacteriaceae*. Although conclusive mechanistic evidence to demonstrate that other SlyA  
90 orthologs function as counter-silencers has not yet been obtained, existing evidence is strongly  
91 suggestive of counter-silencing, as several are known to up-regulate horizontally-acquired traits,

92 which are generally repressed by H-NS, in a number of species, including *Yersinia* spp. (28-30),  
93 *Dickeya dadantii* (31), *Pectobacterium carotovorum* (25) and *Shigella flexneri* (32).

94 TFs can evolve in two ways: *in cis*, through their promoters and associated regulatory  
95 elements, both transcriptional and post-transcriptional, altering expression patterns to respond to  
96 different environmental and physiological stimuli, and *in trans*, affecting their interactions with  
97 cognate binding sites, other proteins, and regulatory ligands. We sought to understand the  
98 evolutionary transition of the SlyA/RovA TF lineage from the ancestral function of MarR family  
99 TFs as environmentally-responsive and dedicated repressors of small regulons to counter-silencers  
100 of extensive networks of horizontally-acquired genes, with a particular focus on *in cis* changes in  
101 gene expression and *in trans* changes in modulation by inhibitory ligands. Structural and  
102 comparative analyses of representative members of the SlyA lineage were performed to identify  
103 the evolutionary changes that allowed SlyA to adopt its new role. Here we show that SlyA has  
104 retained an ability to undergo conformational changes in response to aromatic carboxylates,  
105 regulate gene expression in an environmentally-responsive manner, and repress the expression of  
106 a linked drug efflux system. However, SlyA/RovA lineage genes have undergone extensive  
107 evolution *in cis* to support the higher levels of expression that are required for counter-silencing.  
108 Finally, we show that linked efflux pumps are not conserved in some *Enterobacteriaceae*, even  
109 though SlyA/RovA TFs have been evolutionarily retained, suggesting that these regulators have  
110 been conserved not due to their primordial role in regulating antimicrobial resistance but rather as  
111 a consequence of their counter-silencing function, which is essential to maintain the regulated  
112 expression of horizontally-acquired genes in *Enterobacteriaceae*.

113

114 **Results**

115 **Salicylate-mediated inhibition of SlyA activity.** As environmentally-responsive repressors  
116 whose conformation and regulatory actions are modulated by small aromatic carboxylates (12,  
117 14), MarR family TFs are inhibited by salicylate *in vitro* (12). In their structural analyses of SlyA-  
118 DNA interactions, Dolan *et al.*, (33) inferred from our structural data (see below) that salicylate  
119 might regulate SlyA. Using electrophoretic mobility shift assays, they demonstrated that salicylate  
120 inhibits DNA-binding by SlyA. To confirm that this influences the function of SlyA as a  
121 transcriptional regulator, we performed *in vitro* transcription assays (IVTs) of *slyA* and the  
122 divergently transcribed *ydhIJK* efflux pump operon. Supercoiled plasmid DNA containing the  
123 *slyA-ydhIJK* region was incubated with RNA polymerase (RNAP) and increasing SlyA  
124 concentrations in the presence or absence of salicylate. SlyA repressed *slyA* transcription  
125 approximately 5.3-fold, while *ydhI* transcription was inhibited ~19-fold (Figure 1A, B). The  
126 addition of 2mM sodium salicylate reduced SlyA-mediated repression to 2.8-fold and 3.2-fold,  
127 respectively, indicating that the sensitivity to aromatic carboxylates observed in classical MarR  
128 TFs has been retained by SlyA.

129 We then confirmed that the *ydhIJK* operon encodes a functional antimicrobial efflux pump  
130 by growing wildtype, *slyA*, *ydhIJK*, and *slyA ydhIJK* mutant strains in the presence of an aromatic  
131 carboxylate with antimicrobial activity, fusaric acid (Figure 1C). Both the *ydhIJK* and *slyA ydhIJK*  
132 mutant strains exhibited delayed growth in the presence of fusaric acid relative to the wildtype  
133 strain, suggesting that *ydhIJK* confers fusaric acid resistance in wildtype *S. Typhimurium*.  
134 Conversely, *slyA* mutants exhibit improved growth in the presence of fusaric acid, as predicted  
135 when *ydhIJK* is derepressed. Collectively, these observations indicate that the *S. Typhimurium*  
136 SlyA TF has retained ancestral functions characteristic of the MarR family.

137 To determine whether salicylate inhibits SlyA-mediated counter-silencing as well as  
138 repression, expression of the counter-silenced *pagC* gene was measured by qRT-PCR in the  
139 presence or absence of 2mM sodium salicylate (Figure 1D). Wildtype cultures grown in salicylate  
140 phenocopied a *slyA* mutant strain, with a >14-fold reduction in *pagC* expression, indicating that  
141 salicylate is a general allosteric inhibitor of SlyA function, most likely inducing a structural change  
142 that reduces affinity for DNA as described in other MarR TFs (8, 10). Unexpectedly, SlyA retained  
143 an ability to interact with DNA upstream of the *ydhI* promoter even in the presence of salicylate  
144 (Figure 2 - figure supplement 1), but this interaction may represent non-specific interactions with  
145 the wing domain, as salicylate inhibited SlyA interaction with a 12 bp DNA region that is highly  
146 homologous (75% identity) to the consensus high affinity binding site (19, 34, 35), centered near  
147 the -35 of the *ydhI* TSS.

148 To determine whether salicylate-mediated inhibition correlates with structural changes in  
149 SlyA, <sup>1</sup>H,<sup>15</sup>N-TROSY NMR spectra of *S. Typhimurium* SlyA in the presence or absence of  
150 salicylate were collected. The apo-SlyA spectrum is well dispersed (Figure 2), with ~85% of the  
151 expected resonances observed. However, wide variation among individual resonances with respect  
152 to peak width and intensity may signify [1] weak non-specific interactions between SlyA dimers,  
153 [2] varying rates of exchange of amide protons with solvent, or [3] conformational exchange.  
154 Previous studies of MarR found that apo-MarR is also highly disordered (8), suggesting that the  
155 observed spectral characteristics of apo-SlyA can be ascribed to the presence of multiple  
156 conformational states in solution. Addition of salicylate to SlyA induces chemical shift  
157 perturbations throughout the spectrum and nearly 90% of expected resonances are now observed.  
158 The large-scale changes in chemical shifts show that backbone amides throughout the protein are  
159 stabilized in a different environment relative to apo-SlyA. These observations are consistent with

160 ligand binding to SlyA dimers inducing global structural changes, likely stabilizing a single protein  
161 conformation in solution, a conformation that is no longer able to interact with specific high-  
162 affinity DNA binding sites. The affinity of the SlyA-ligand interaction was determined via the  
163 quenching of intrinsic tryptophan fluorescence in the presence of increasing concentrations of  
164 benzoate, an analogous small aromatic carboxylate compound (Figure 2 - figure supplement 2).  
165 Benzoate induces similar chemical shift perturbations to those observed in response to salicylate  
166 but does not cause inner filter effects that interfere with fluorescence measurement, as there is  
167 relatively little overlap between the UV spectra of benzoate and SlyA, in contrast to salicylate.  
168 Although this assay was not able to differentiate between multiple SlyA-benzoate interactions, the  
169  $K_D$  of the SlyA-benzoate interaction was determined to be  $\sim 40\mu\text{M}$ , which is similar to the  
170 previously determined affinities for EmrR/MprA and HucR (1-10 $\mu\text{M}$ ), and significantly stronger  
171 than that of the MarR-salicylate interaction (0.5-1mM) (13, 36).

172 **Crystal structure of salicylate-SlyA.** To further analyze the mechanism of allosteric inhibition  
173 of SlyA, the structure of the salicylate-SlyA co-crystal was determined. Studies by other groups  
174 have previously determined the structure of apo-SlyA and the SlyA bound to DNA (33),  
175 demonstrating that SlyA is similar in overall structure to other MarR proteins, consisting of six  
176 alpha helices (Figure 3A). Helices  $\alpha 1$ ,  $\alpha 5$ , and  $\alpha 6$  make up the dimerization domain, while  $\alpha 3$  and  
177  $\alpha 4$ , along with the wing region between  $\alpha 4$  and  $\alpha 5$  comprise the wHTH DNA-binding domain.  
178 These two domains are separated by  $\alpha 2$ . Dolan *et al.* (33) previously observed that the two  
179 recognition helices of the apo-SlyA dimer are only  $\sim 15\text{\AA}$  apart, in a closed conformation. During  
180 interaction with a high-affinity binding site, the helices move a significant distance to  
181 accommodate the  $32\text{\AA}$  distance between major grooves.



182 SlyA formed large crystals in the presence of 75mM sodium salicylate (Figure 3 - figure  
183 supplement 1). However, we were unable to obtain usable crystals of apo-SlyA. Diffraction data  
184 set and refinement statistics are summarized in Tables S1 and S2, respectively. The two SlyA  
185 molecules in the asymmetric unit form two different SlyA dimers in this crystal form. Space group  
186 symmetry operations generate the other subunit in each dimer. The dimers are very similar in  
187 structure, and further discussion will focus on the dimer formed by polypeptide chain A. We were  
188 unable to observe electron density for the tips of the wings, so these regions are absent from our  
189 structural model. Difference electron density maps ( $|F_o| - |F_c|$ ) identified two salicylate molecules  
190 bound per SlyA monomer at sites referred to as Site I and Site II (Figure 3A-C). Salicylate  
191 molecules interact with these sites via hydrophobic interactions with their aromatic rings, while  
192 the carboxylate and hydroxyl groups are positioned to interact with the solvent. Site I is composed  
193 of residues from  $\alpha 2$ ,  $\alpha 3$ , and  $\alpha 4$ , as well as I58 in the loop between  $\alpha 3$  and  $\alpha 4$ , and is well positioned  
194 to sterically inhibit DNA binding. It should be noted that the residue numbers in the deposited  
195 PDB file are not in register with the residue numbers in this text which are based on alignment of  
196 SlyA orthologs. Comparison with apo-SlyA and SlyA-DNA structures (33) indicates that this  
197 salicylate molecule causes the  $\alpha 4$  recognition helix to rotate by  $\sim 35^\circ$  around its axis, disrupting  
198 specific contacts with the DNA major groove. Site II is formed by residues from both dimer  
199 subunits, almost completely sequestering the salicylate molecule from the solvent. The buried  
200 polar groups of salicylate interact with S7' and R14' in  $\alpha 1$  of one subunit and R17 in  $\alpha 1$  and H38  
201 in  $\alpha 2$  from the other subunit. A third salicylate binding site was observed on the surface of each  
202 subunit of the dimer. However, this site is adjacent to SlyA residues involved in crystal packing  
203 contacts and may not be biologically relevant.

204 **Mutational analysis of allosteric inhibition of SlyA.** We constructed a series of *slyA* alleles with  
205 site-specific mutations of the salicylate-binding pocket in order to test the functional significance  
206 of salicylate interactions *in vivo*. When wildtype *slyA* is expressed *in trans* from its native  
207 promoter, *pagC* expression increases over 350-fold in inducing medium containing 10 $\mu$ M MgCl<sub>2</sub>  
208 compared to cultures grown with salicylate (Figure 4A). We tested 8 different mutant alleles for  
209 changes in counter-silencing activity in response to salicylate. One allele substituting an alanine  
210 for tyrosine 66 in site I (T66A), resulted in complete abrogation of salicylate-mediated inhibition,  
211 suggesting that T66 is essential for salicylate binding. However the T66A mutation also decreased  
212 *pagC* expression in the absence of salicylate over 25-fold, indicating that it is required for the  
213 wildtype activity of SlyA. A second mutant, W34A in site II, also exhibited reduced salicylate-  
214 mediated repression. The analysis of these mutants indicates that both site I and site II bind  
215 salicylate *in vivo*, and that both sites influence SlyA activity. Notably, both T66 and W34 are  
216 absolutely conserved in over 55 enterobacterial genera examined in this study (see below),  
217 suggesting that these residues are important for SlyA function throughout the *Enterobacteriaceae*  
218 (Table S3).

219 To determine whether salicylate directly inhibits SlyA *in vivo* or stimulates the release of  
220 intracellular Cu<sup>2+</sup> from membrane bound proteins to promote disulfide bond formation, we  
221 mutated the single cysteine residue in SlyA, C81. SlyA C81A exhibited a similar salicylate  
222 inhibition phenotype to wildtype SlyA, indicating that allosteric inhibition does not occur by  
223 disulfide bond formation between cysteine residues *in vivo*. We subsequently generated a  
224 chromosomal C81S mutant to determine whether SlyA is directly inhibited by Cu<sup>2+</sup>. Transcription  
225 of *pagC* in strains encoding wildtype or C81S *slyA* was reduced approximately two-fold after the  
226 addition of 100 $\mu$ M CuCl<sub>2</sub> to the growth medium (Figure 4B). Although this difference was

227 statistically significant ( $p < 0.001$ ), it was also observed in the mutant strain encoding C81S SlyA,  
228 indicating that this modest effect is not due to disulfide-dependent tetramerization as proposed for  
229 MarR (15). Furthermore, modulation by copper does not appear to be biologically significant in  
230 comparison to the 350-fold effect of salicylate.  $\text{Cu}^{2+}$ -mediated derepression of the *marRAB* operon  
231 was confirmed under comparable conditions by measuring *marA* expression, which increased  
232 approximately 7.5-fold (Figure 4C).

233 **Evolutionary analysis of the SlyA TF lineage.** To identify other variables that may have  
234 contributed to the evolution of the SlyA lineage, we performed an evolutionary analysis of species  
235 representing 60 genera of *Enterobacteriaceae*, including *candidatus* organisms for which genomic  
236 data was available. SlyA is strongly conserved, with orthologs found in 55 organisms, suggesting  
237 that SlyA plays a central role in enterobacterial regulatory circuitry. Genera lacking identifiable  
238 SlyA orthologs include *Buchnera*, *Hamiltonella*, *Samsonia*, *Thorsellia*, and *Plesiomonas*, which  
239 are only distantly related to *Salmonella* and *Escherichia* in comparison to other members of the  
240 *Enterobacteriaceae*. Notably, we were also unable to identify an *hns* ortholog in *Plesiomonas*.  
241 Phylogenetic analysis reveals five clusters of SlyA orthologs (Figure 5), with the general structure  
242 of the phylogram resembling the genomic tree for *Enterobacteriaceae* (37). SlyA orthologs in  
243 enteric pathogens including *E. coli*, *S. Typhimurium*, and *S. flexneri* form cluster I, while cluster  
244 II is composed of a more heterogeneous group of organisms, including plant pathogens such as *D.*  
245 *dadantii*, insect endosymbionts like *S. glossinidius*, and more distantly related pathogens such as  
246 *Y. pseudotuberculosis*. SlyA orthologs in clusters I and II are known to function as pleiotropic  
247 regulators, despite significant divergence from the other clusters (28, 31). Clusters III and IV are  
248 comprised of environmental organisms such as the plant-associated species *Pantoea agglomerans*  
249 and *Phaseolibacter flectens*, while cluster V contains hydrogen-sulfide producing bacteria such as

250 *Pragia fontium*. This degree of conservation suggests that SlyA diverged from the greater MarR  
251 family of TFs prior to the divergence of *Enterobacteriaceae* from other bacteria. Although not  
252 strongly conserved outside of *Enterobacteriaceae*, SlyA orthologs can be detected in selected  
253 species throughout the Gammaproteobacteria, indicating that the lineage is ancient. However, the  
254 *slyA* gene typically exhibits an AT-content (51% in *S. Typhimurium*) marginally higher than that  
255 of the chromosomal average (48% in *S. Typhimurium*), suggesting that it may have been  
256 duplicated through an ancient transfer event.

257 To determine if allosteric inhibition is likely to be conserved throughout the SlyA lineage,  
258 we aligned the sequences of SlyA orthologs from different bacterial species to analyze the  
259 conservation of residues involved in salicylate binding (Table S3). Cluster I exhibited nearly  
260 complete conservation of the salicylate-binding residues, with only four of 24 genomes encoding  
261 polymorphisms. Cluster II exhibited the greatest variation, with 16 of 23 genomes encoding  
262 polymorphisms, including 10 which encoded the polymorphism H38Y. We identified only one  
263 polymorphism in site I in six genomes, a T32I substitution, suggesting that site I is particularly  
264 important for SlyA function. As further evidence of the importance of site I, a T66A mutation  
265 abrogated allosteric inhibition of SlyA. The central residues of site II (R14, W16, R17, and W34)  
266 are similarly conserved suggesting that these residues are also important for SlyA function. We  
267 were able to mutate two of these residues (Figure 4A), R14 and W34, and found that W34 is also  
268 involved in allosteric inhibition. Individual polymorphisms such as T32I and H38Y appear to have  
269 evolved independently in multiple clusters, suggesting purifying selection, although their effect on  
270 SlyA activity is currently unknown. Alignment of SlyA protein sequences from representative  
271 species of each of the five clusters revealed that most sequence variation occurs in the carboxyl-

272 terminus oligomerization domain (Figure 5 - figure supplement 1), suggesting that ligand  
273 sensitivity and DNA binding are conserved features of the SlyA lineage.

274 As the ancestral function of MarR TFs is the negative regulation of genes encoding drug  
275 efflux pumps, a function that is conserved in *S. Typhimurium*, we examined *slyA* orthologs  
276 throughout the *Enterobacteriaceae* for linkage to flanking genes of known or hypothetical  
277 function: *slyB*, which encodes a putative outer membrane lipoprotein with no observed  
278 phenotype, *ydhJ* which encodes a hemolysin D homolog, and *ydhK*, encoding the efflux pump  
279 (Figure 6A, B). It should be noted that *ydhJ* also exhibits homology to *emrA*, which encodes an  
280 antimicrobial efflux pump-associated protein linked to and regulated by another MarR family TF  
281 called MprA or EmrR (38, 39). We found that cluster I exhibited the strongest linkage, with 100%,  
282 95%, and 100% linkage to *ydhJ*, *ydhK*, and *slyB* respectively, while cluster V, containing the  
283 hydrogen sulfide-producing bacteria, exhibited no linkage to *slyA* for any of the genes examined.  
284 Outside of cluster V, *slyB* was strongly associated with *slyA*, exhibiting 76% linkage overall.  
285 However, the *ydh* operon was not strongly linked outside of cluster I, exhibiting 26%, 33% and  
286 33% linkage in clusters II, III, and IV respectively. In contrast, although *marR* was absent from  
287 26 of the enterobacterial species examined, *marR* was linked to *marAB* in every *marR*-carrying  
288 species. This suggests that the primary function of MarR is to regulate the *marRAB* operon, and  
289 MarR consequently does not play an important role in enterobacterial regulatory circuitry. In  
290 contrast, the loss of the ancestral linkage between *slyA* and *ydhJ* outside of cluster I suggests that  
291 the SlyA lineage has evolved to serve a distinct function.

292 The *ydhIJK* operon does not appear to have been exchanged for another drug efflux system.  
293 (Figure 6C). Sequences homologous to the proximal portion of the *ydhI* gene are detectable even  
294 in species that have not retained functional coding sequences (e.g., *Y. pseudotuberculosis*).

295 However, a 100 bp segment of the *ydhI-slyA* intergenic region, beginning approximately 95 bp  
296 upstream of the *slyA* start codon, has undergone extensive mutation (Figure 6C), suggesting *in cis*  
297 evolutionary adaptation in the *slyA* lineage of TFs. We examined the regions upstream of *slyA* in  
298 several related species of three genera, *Escherichia*, *Salmonella*, and *Yersinia*, to better understand  
299 the recent evolution of this region, and observed that the *ydhI-slyA* intergenic regions exhibit  
300 considerable divergence between genera and conservation within genera (Figure 6 - figure  
301 supplement 1). A comparison between the *ydhI-slyA* intergenic regions of *Escherichia coli* and  
302 *Salmonella Typhimurium* with those of *Klebsiella pneumoniae* and *Enterobacter cloacae* revealed  
303 similar degrees of divergence between each genus, suggesting that an ancestral allele can no longer  
304 be defined. A phylogenetic analysis of *slyA* upstream regions in a representative subset of the  
305 species described above demonstrated extensive variation throughout the *Enterobacteriaceae*  
306 (Figure 6 - figure supplement 2). However, this variation did not always correlate with SlyA coding  
307 region clusters. Although the intergenic regions of cluster I are closely related and may have co-  
308 evolved with their respective coding sequences, the other clusters are more variable, and some  
309 intergenic regions may have evolved independently of their coding sequences.

310 Examination of the *ydhI-rovA* region in *Yersinia spp.* reveals that *rovA* in *Y.*  
311 *pseudotuberculosis* (Figure 6C) and *Y. pestis* (Figure 6 - figure supplement 1) is not linked to a  
312 functional *ydhIJK* operon, whereas *ydhIJK* is retained in *Y. enterocolitica*. This indicates that  
313 *ydhIJK* was not lost by the former species until after the divergence of *Yersinia* from other  
314 *Enterobacteriaceae* and suggests that other species of *Enterobacteriaceae* are also likely to have  
315 lost *ydhIJK* recently, as each became adapted to its own specific niche. This represents an example  
316 of parallel evolution, with multiple species independently losing *ydhIJK* to accommodate *in cis*  
317 evolution as their respective SlyA orthologs adapted to new roles.

318

319 **Functional characterization of a distantly related SlyA ortholog.** To understand how the SlyA  
320 lineage adapted to its emergent role as an important pleiotropic regulatory protein in the  
321 *Enterobacteriaceae*, we compared the functions of SlyA from *S. Typhimurium* (SlyA<sub>STM</sub>) and  
322 RovA of *Y. pseudotuberculosis* and *Y. enterocolitica*, a relatively divergent ortholog that also  
323 functions as a counter-silencer (28-30, 40). RovA of *Y. pseudotuberculosis* exhibits 76% identity  
324 with SlyA<sub>STM</sub> (Figure 5 - figure supplement 1). RovA is essential for virulence in *Y. enterocolitica*,  
325 and *Y. pestis* (28, 41) and has been suggested to function both as an activator, interacting with  
326 RNAP (42), and as a counter-silencer, alleviating H-NS-mediated repression (29, 30, 40). Notably,  
327 direct activation has not been demonstrated for any other member of the SlyA lineage, and the  
328 most direct evidence to suggest that RovA functions as an activator is derived from IVT studies  
329 using small linear fragments of DNA as a template (42). We have previously shown that small  
330 linear fragments are not necessarily representative of physiological regulatory events in intact cells  
331 and can generate spurious results in IVT assays (17). Genetic analysis of the *inv* gene, which is  
332 positively regulated by RovA, in an *hns* mutant strain of *E. coli* also suggested that RovA functions  
333 as both a counter-silencer and an activator. However, these experiments failed to consider the  
334 potential contribution of the H-NS paralog, StpA, which is up-regulated in *hns* mutants and can  
335 provide partial complementation (43, 44), which complicates the interpretation of regulatory  
336 studies in an *hns* mutant strain.

337 We attempted to corroborate the published findings by performing IVT analysis of *inv*  
338 expression in the presence of RovA. However, expression of *inv* exhibited only a very modest  
339 (~1.5-fold) increase following the addition of RovA (Figure 7A), which became saturated at a 20  
340 nM concentration; these results are not supportive of direct *inv* activation by RovA. In contrast,



341 RovA was confirmed to function as an auto-repressor, like other MarR family TFs, as IVT analysis  
342 demonstrated a 4-fold decrease in *rovA* expression following the addition of RovA protein, with  
343 the effect reaching saturation at a 500 nM concentration (Figure 7B). RovA has also retained the  
344 ability to respond to salicylate (Figure 7C), despite the presence of an H38Y substitution in the  
345 second salicylate-binding pocket (Table S3), as 5mM salicylate completely inhibited RovA-  
346 mediated repression, similar to our observations with SlyA. It is also notable that RovA has  
347 retained salicylate sensitivity despite the loss of the linked YdhIJK efflux pump in *Y.*  
348 *pseudotuberculosis*. To prove that RovA functions as a counter-silencer in *Y. pseudotuberculosis*,  
349 we measured *inv* expression in wild-type and *rovA* mutant strains expressing H-NST from  
350 enteropathogenic *E. coli* (H-NST<sub>EPEC</sub>). Mutations in *hns* cannot be generated in *Yersinia* as  
351 *Yersinia* spp. carry a single essential *hns* gene, unlike many other members of the  
352 *Enterobacteriaceae* which encode *hns*-like genes such as *stpA*, which are able to partially  
353 compensate for the loss of *hns*. H-NST<sub>EPEC</sub> is a truncated *hns* homolog that has been demonstrated  
354 to function as a dominant negative form of H-NS by binding and inhibiting the activity of wild-  
355 type H-NS protein (45). The expression of *inv* in *rovA* mutant bacteria was approximately four-  
356 fold lower than in wild-type cells (Figure 7D). However, *inv* expression was fully restored upon  
357 inhibition of H-NS by *hns*<sub>T<sub>EPEC</sub></sub>, demonstrating that RovA functions solely as a counter-silencer  
358 of the *inv* gene. The *rovA* and *slyA* genes are capable of complementing each other in both *S.*  
359 Typhimurium and *Y. pseudotuberculosis* when expressed *in trans* (Figure 7E, F), up-regulating  
360 both *inv* and *pagC*, further indicating that RovA functions as a counter-silencer, like SlyA.  
361 Together, these observations demonstrate that RovA has retained the ancestral characteristic of  
362 environmentally-responsive repression exhibited by other members of the MarR TF family,  
363 despite being one of the most divergent members of the SlyA lineage. However, in contrast to



364 MarR TFs outside of the SlyA lineage, it is also able to function as a counter-silencer of  
365 horizontally-acquired genes, as exemplified by *inv*.

366 **SlyA counter-silencing requires high expression levels.** It is interesting to note that SlyA does  
367 not play a major regulatory role in *Escherichia coli*, the most well-studied member of the  
368 *Enterobacteriaceae*. SlyA is only known to regulate two *E. coli* genes, *hlyE* and *fimB* (46-48),  
369 despite exhibiting a high degree of homology (91% identity) to SlyA in *S. Typhimurium*. To  
370 better understand the different roles of SlyA in the regulatory hierarchy of *E. coli* and *S.*  
371 *Typhimurium*, we performed a comparative genetic analysis of the *S. Typhimurium* (*slyA*<sub>STM</sub>)  
372 and *E. coli* (*slyA*<sub>Eco</sub>) alleles. In allelic exchange experiments, the *slyA*<sub>STM</sub> coding sequence was  
373 swapped with *slyA*<sub>Eco</sub> to determine the effect on the expression of the counter-silenced *S.*  
374 *Typhimurium* *pagC* gene (Figure 8A). We observed that SlyA<sub>Eco</sub> is able to counter-silence the  
375 expression of *pagC* similarly to SlyA<sub>STM</sub>, suggesting that the diminished role of SlyA in *E. coli* is  
376 not attributable to differences in protein sequence. This suggested that the importance of  
377 different SlyA lineage proteins within their respective regulatory networks may be the result of  
378 the different *in cis* evolutionary pathways identified in our phylogenetic analysis (Figure 6 and  
379 Figure 6 - figure supplement 1), resulting in differences in levels of expression. To test this  
380 hypothesis, *slyA* intergenic region-ORF chimeras were constructed and assessed for their ability  
381 to counter-silence *pagC*. To avoid potentially confounding results due to multiple transcriptional  
382 start sites (TSSs), we exchanged the intergenic regions beginning immediately upstream of each  
383 start codon. Counter-silencing was assessed in a *slyA* mutant carrying pKM05, a plasmid with  
384 the *slyA*<sub>STM</sub> ORF transcribed by the *E. coli* promoter (*P**slyA*<sub>Eco</sub>), or pKM07, a plasmid with the  
385 *slyA*<sub>STM</sub> ORF transcribed by its native promoter (*P**slyA*<sub>STM</sub>). Although *pagC* expression was  
386 similar with either construct under non-inducing conditions, expression was approximately 10-

387 fold lower with *slyA* expressed from  $P_{slyA_{Eco}}$  under inducing conditions (Figure 8B), suggesting  
388 that the diminished role of SlyA in *E. coli* is at least partially attributable to differences in *slyA*  
389 expression levels in *S. Typhimurium* and *E. coli*. Although *slyA* expression driven by  $P_{slyA_{Eco}}$  is  
390 only slightly lower under non-inducing conditions, it is approximately 3-fold greater when  
391 driven by  $P_{slyA_{STM}}$  under inducing conditions (Figure 8C), suggesting that  $P_{slyA_{Eco}}$  is less  
392 responsive to environmental signals associated with virulence gene expression in *Salmonella*,  
393 and thus is unable to regulate *slyA* expression in a manner appropriate for counter-silencing.  
394 Parallel experiments in *Y. pseudotuberculosis* revealed that *rovA* is also more strongly expressed  
395 from its native promoter ( $P_{rovA_{Yps}}$ ) than from a chimera expressing *rovA* from  $P_{slyA_{Eco}}$  (Figure 8  
396 - figure supplement 1), despite the fact that  $P_{rovA_{Yps}}$  has diverged much more significantly from  
397 both  $P_{slyA_{Eco}}$  and  $P_{slyA_{STM}}$  than  $P_{slyA_{Eco}}$  and  $P_{slyA_{STM}}$  have diverged from each other (Figure 6 -  
398 figure supplement 1).

399

## 400 **Discussion**

401 The ancient MarR family of transcription factors is represented throughout the bacterial  
402 kingdom and in many archaeal species (36). This study sought to understand how the SlyA/RovA  
403 lineage of MarR TFs in the *Enterobacteriaceae* evolved to acquire the novel function of counter-  
404 silencing. Our observations demonstrate that SlyA proteins have retained vestiges of their ancestral  
405 functions, e.g., the environmentally-responsive repression of small molecule efflux systems, while  
406 acquiring an ability to act as pleiotropic counter-silencers of horizontally-acquired genes. The  
407 latter role has been facilitated by the parallel evolution of cis-regulatory elements that support  
408 higher levels of gene expression.

409 SlyA, like other MarR family TFs, is subject to allosteric inhibition by small aromatic  
410 carboxylate compounds such as salicylate, which bind and stabilize the SlyA dimer in a  
411 conformation unfavorable for DNA binding (Figure 2 and Figure 2 - figure supplement 1).  
412 However, the specific structure and arrangement of the effector binding sites varies significantly  
413 among the MarR family. Our structural data indicate that SlyA binds a total of six salicylate  
414 molecules per dimer, although two of these are not likely to be biologically relevant (Figure 3).  
415 Although the general structure and architecture of the salicylate-SlyA complex is similar to  
416 complexes formed by other MarR TFs, including MarR (8) and MTH313 from *Methanobacterium*  
417 *thermautrophicum* (49), the various TFs differ significantly in their specific interactions with  
418 salicylate. MarR binds a total of four salicylate molecules per dimer, whereas MTH313 binds only  
419 two (Figure 3D, E). All four salicylate-binding sites in MarR flank the wHTH domain and are  
420 partially exposed to solvent, whereas none of these sites corresponds to the salicylate binding sites  
421 of SlyA, potentially accounting for the significant differences in affinity for aromatic carboxylates  
422 between the two proteins. MTH313 binds salicylate asymmetrically at sites similar to sites I and  
423 II of SlyA, binding only one salicylate molecule per monomer. It is possible that the structural  
424 variability in the MarR family with respect to salicylate binding reflects an inherent evolutionary  
425 flexibility and ligand promiscuity. The MarR family sensor region may have evolved to interact  
426 with a variety of small molecules, and salicylate may simply represent a promiscuous probe for  
427 potential interactions. Recent studies have suggested that the true ligand of MarR may be copper,  
428 liberated from membrane-associated proteins during oxidative stress induced by xenobiotic agents.  
429 Copper reportedly oxidizes a cysteine residue (C80) to promote disulfide bond formation between  
430 MarR dimers, resulting in subsequent tetramerization and inhibition of DNA binding (15). As  
431 almost all characterized MarR TFs have a reactive cysteine residue corresponding to a region near

432 Site II of SlyA, we considered that cysteine oxidation, which has also been described in the MarR  
433 family TF OhrR (50), might occur in the SlyA lineage as well. However, mutation of C81, the lone  
434 cysteine residue in SlyA<sub>STm</sub>, had a negligible effect on SlyA activity in both the presence and  
435 absence of salicylate. The addition of copper to the growth medium had a minimal impact on SlyA  
436 activity and was unaffected by mutation of C81, indicating that cysteine oxidation is not a general  
437 mechanism for the allosteric inhibition of MarR family TFs. Furthermore, the high affinity of SlyA  
438 for aromatic carboxylates (Figure 2 - figure supplement 2) and the conservation of binding pocket  
439 residues (Table S3) reported in this study suggest that environmental sensitivity and allosteric  
440 inhibition are a conserved feature of SlyA activity in their new regulatory role.

441 A phylogenetic analysis of SlyA orthologs in *Enterobacteriaceae* demonstrates that the  
442 SlyA lineage is strongly conserved, even in endosymbiotic species exhibiting significant genome  
443 loss (Figure 5 and Figure 5 - figure supplement 1). This suggests that SlyA has a central and  
444 essential role in the transcriptional regulatory networks of these species. For example, a recent  
445 analysis of the endosymbiont *W. glossinidia* found that *slyA* is subject to significant evolutionary  
446 constraints (51). This conservation does not appear to be due to its role as a regulator of  
447 antimicrobial resistance, as *slyA* does not exhibit significant linkage to the efflux pump operon  
448 *ydhIJK*, outside of the enteric pathogens in cluster I (Figure 6). Rather, SlyA proteins appear to  
449 function predominantly as pleiotropic counter-silencers, facilitating the integration of horizontally-  
450 acquired genes, including virulence genes, into existing regulatory networks. A general counter-  
451 silencing role has been suggested in multiple enterobacterial species including *E. coli* (19, 48),  
452 *Salmonella* (17, 20, 21) and *Shigella* (32) in cluster I, and *Yersinia* (31, 52), *Serratia*, and  
453 *Pectobacterium* (*Erwinia*) (25) in cluster II. Although similar evidence does not currently exist for

454 the endosymbionts of cluster II, this may simply reflect the limited genetic analyses that have been  
455 performed in these species.

456 To understand the evolutionary adaptations to accommodate counter-silencing by the  
457 SlyA/RovA lineage, we compared three orthologs, *slyA*<sub>STM</sub>, *slyA*<sub>Eco</sub> and *rovA*. The *slyA*<sub>STM</sub> and  
458 *rovA* genes are essential for *Salmonella* and *Yersinia* virulence, whereas *slyA*<sub>Eco</sub> plays a negligible  
459 role in *E. coli*, despite exhibiting a much higher degree of similarity to *slyA*<sub>STM</sub> than does *rovA*.  
460 These differing roles are attributable to differences in expression, as SlyA<sub>Eco</sub> is able to function as  
461 a counter-silencer in *S. Typhimurium* when its expression is driven by the *S. Typhimurium*  
462 promoter (Fig. 6). We also observed that *slyA*<sub>Eco</sub> transcription is significantly reduced in medium  
463 with low Mg<sup>2+</sup> concentrations, a condition associated with the *Salmonella*-containing vacuole  
464 (SCV) of macrophages, in which SlyA cooperates with the response regulator PhoP to counter-  
465 silence virulence genes necessary for intracellular survival (17). This suggests that the diminished  
466 role of *slyA*<sub>Eco</sub> in *E. coli* may result from its inability to respond to appropriate environmental cues.  
467 This is further reinforced by the observation that RovA of *Yersinia* spp. is able to function as a  
468 counter-silencer in *S. Typhimurium* when expressed *in trans* from an inducible promoter, and that  
469 the *rovA* promoter of *Y. pseudotuberculosis* drives *rovA* transcription more strongly than P*slyA*<sub>Eco</sub>  
470 in a chimeric strain (Fig. S7). This suggests that evolution of the SlyA-RovA lineage *in trans*,  
471 particularly DNA binding specificity, has played only a minor role since the divergence of the  
472 *Enterobacteriaceae*. This is further supported by a comparison of distantly-related SlyA  
473 orthologs, which exhibit most sequence divergence in the C-terminal oligomerization domain and  
474 not the N-terminal region containing the wHTH (Figure 5 - figure supplement 1). We conclude  
475 that the ability of a given SlyA ortholog to serve as a counter-silencer is contingent on its level and  
476 pattern of expression, which may be the product of both transcriptional and post-transcriptional

477 activity, as mutations altering TSS position will subsequently alter the 5' untranslated region of  
478 the *slyA* transcript. Notably, another group recently demonstrated a significant expansion of the  
479 SlyA regulon in *E. coli* when *slyA*<sub>Eco</sub> is overexpressed, with 30 operons exhibiting regulation by  
480 SlyA, 24 of which are also repressed by H-NS (34), indicating that SlyA<sub>Eco</sub> is capable of  
481 functioning as a counter-silencer but is not expressed under the appropriate conditions. In *S.*  
482 Typhimurium, the appropriate conditions are those associated with the SCV. However, SlyA  
483 orthologs in other species such as the plant pathogens and endosymbionts of cluster II are likely  
484 to require expression under vastly different conditions corresponding to their environmental  
485 niches. The loss of the divergently-transcribed *ydhIJK* operon in *Y. pseudotuberculosis* and other  
486 enteric species may be a consequence of genetic alterations to enhance *rovA* expression as well as  
487 the redundancy of drug efflux pumps. An additional possibility is that enhanced *slyA/rovA*  
488 expression might result in hyper-repression of *ydhIJK*, which would negate the usefulness of the  
489 pump to the cell. Even the plant pathogens such as *D. dadantii* and *P. carotovorum*, which are  
490 most likely to encounter small phenolic compounds in the plant environment (53), have failed to  
491 retain *ydhIJK*. It is also notable that the *slyA* orthologs in the four species (*E. coli*, *S.* Typhimurium,  
492 *Y. enterocolitica*, *Y. pseudotuberculosis*) in which the transcriptional start sites have been  
493 characterized initiate transcription at different positions (30, 54-57), indicating that each species  
494 has evolved its *cis*-regulatory circuit independently (Figure 6).

495 Previous studies have demonstrated that regulatory evolution can promote adaptation to  
496 new niches (58). The SlyA/RovA TF lineage provides a unique example of parallel regulatory  
497 evolution to achieve a common functional objective. Throughout the *Enterobacteriaceae*, the  
498 associated *ydhIJK* pump genes have been repeatedly lost, yet their regulators have been retained,  
499 presumably to facilitate the evolution of an appropriately responsive regulatory circuit to enable

500 counter-silencing. This suggests that SlyA/RovA proteins possess intrinsic features that predispose  
501 them for a counter-silencing role, perhaps the abilities to respond to environmental stimuli and to  
502 recognize a variety of AT-rich target DNA sequences. Studies are underway to characterize these  
503 features and to determine their contribution to the evolutionary capacity of *Enterobacteriaceae*.

504 **Materials and methods.**

505 **Bacterial strains and general reagents.** All oligonucleotides and plasmids used in this study are  
506 described in Table S4 and Table S5, respectively. Unless otherwise indicated, bacteria were grown  
507 in Luria Bertani (LB) broth with agitation. *Salmonella enterica* serovar Typhimurium strains were  
508 constructed in the ATCC 14028s background and grown at 37°C, unless otherwise indicated. The  
509 14028s *slyA* mutant strain was described previously (17). *Yersinia pseudotuberculosis* YPIII (59)  
510 and YP107 (60) (a gift from P. Dersch, Helmholtz Centre for Infection Research) were used as  
511 the wildtype and *rovA* strains, respectively, and grown at 24°C. A *ydhIJK* deletion mutant was  
512 constructed using the  $\lambda$ -Red recombinase system (61) and oligonucleotides WNp318 and  
513 WNp319. A *slyA ydhIJK* strain was generated by introducing the *slyA::Cm* cassette from 14028s  
514 *slyA::Cm* (17) to 14028s *ydhIJK* via P22HTint-mediated transduction. To exchange the wild-type  
515 *S. Typhimurium slyA* coding sequence with the *E. coli* allele, *S. Typhimurium slyA* was replaced  
516 with a *thyA* cassette, via FRUIT (62), using the oligonucleotides STM-slyA-targ-F and STM-slyA-  
517 targ-R. The *slyA* coding sequence from *E. coli* K-12 was then amplified using the primers STM-  
518 Eco-slyA-F and STM-Eco-slyA-R, which include 40 and 41 bases, respectively, from the regions  
519 flanking the *S. Typhimurium slyA* coding sequence. This fragment was electroporated into the  
520 *slyA::thyA* mutant strain and the resulting transformants were plated on minimal media containing  
521 trimethoprim, as described for the FRUIT method (62), to select for replacement with the *E. coli*  
522 *slyA* allele.

523 The chromosomal C81S *slyA* mutation (TGC→AGC) was generated by cloning a 1 kb  
524 fragment encoding the C81S mutation into the suicide vector pRDH10 (63) using Gibson  
525 Assembly (New England Biolabs, Ipswich MA). The Gibson assembly reaction included PCR  
526 products generated with primers JKP736/JKP737 and JKP738/JKP739 and genomic *S.*



527 Typhimurium DNA as well as *Bam*HI-digested pRDH10 to generate pJK723. For integration of  
528 *slyA* C81S into the chromosome, S17-1 $\Delta$  $\lambda$ pir (64)/pJK723 was mated with *S.* Typhimurium  
529 14028s/pSW172 (65) and plated onto LB+20  $\mu$ g ml<sup>-1</sup> chloramphenicol and incubated at 30°C  
530 overnight. Chloramphenicol- and carbenicillin-resistant (Cm<sup>r</sup> Carb<sup>r</sup>) colonies that were isolated  
531 represented a single crossover event of pJK723 (Cm<sup>r</sup>) plasmid into the *slyA* region of *S.*  
532 Typhimurium 14028s (Carb<sup>r</sup>). Selection for the second crossover event to replace wild-type *slyA*  
533 with a *slyA* C81S mutation was performed by plating 0.1ml of an overnight culture of Cm<sup>r</sup> Carb<sup>r</sup>  
534 colony onto LB+5% sucrose plates and incubating at 30°C overnight. Colonies were then streaked  
535 onto LB plates at 37°C and putative 14028s *slyA* C81S colonies confirmed by DNA sequencing.

536 **Cloning.** pSL2143 was generated by amplifying the *slyA*<sub>STm</sub> region, including its native promoter,  
537 with primers slyAcomp-F and slyAcomp-R, and ligating into pWSK29 (66) digested with *Eco*RV.  
538 The G6A, S7A, A10P, R14A, W34A, H38A, T66A and C81A mutants were generated with their  
539 respective mutagenic primer pairs (Table S4) using the QuikChange XL Site-Directed  
540 Mutagenesis Kit (Agilent Technologies, Santa Clara CA) according to the manufacturer's  
541 protocol. A 2249 bp region containing both *slyA* and *ydhI* was amplified by PCR using the primers  
542 SlyAreg-F and SlyAreg-R. The resulting fragment was digested with *Bam*HI and *Hind*III and  
543 ligated into the low-copy IVT scaffold vector pRW20 (17) to generate pRW39. An IVT target  
544 containing the 2379 bp *rovA* region from *Y. pseudotuberculosis* was generated using the primers  
545 BamHI-rovA-F and EcoRI-rovA-R. The resulting fragment and pRW20 were both digested with  
546 *Bam*HI and *Eco*RI and ligated together to construct pRW54. An IVT target containing the 2708  
547 bp *inv* region from *Y. pseudotuberculosis* was generated via PCR using the primers BamHI-inv-F  
548 and EcoRI-inv-R. The resulting fragment and pRW20 were both digested with *Bam*HI and *Eco*RI  
549 and ligated together to construct pRW55. To perform *rovA* and *slyA* complementation studies, both

550 genes were cloned into the arabinose-inducible expression vector pBAD18 (67). The *rovA* gene  
551 was amplified using the oligonucleotides EcoRI-rovA-F and KpnI-rovA-R. The *slyA* gene was  
552 amplified using the oligonucleotides EcoRI-slyA-F and KpnI-slyA-R. Both fragments were  
553 digested with *EcoRI* and *KpnI*, and ligated into pBAD18, generating pRW58 (*slyA*) and pRW59  
554 (*rovA*). pRW60 was constructed by cloning an *N*-terminal 6×His-tagged copy of *rovA* into  
555 pTRC99a (68). The *rovA* gene was amplified from YPIII genomic DNA by PCR using the  
556 oligonucleotides 6HisRovA-F and 6HisRovA-R. The resulting fragment and pTRC99a were  
557 digested with *NcoI* and *BamHI*, and ligated together. An *E. coli* P<sub>*slyA*</sub>-S. Typhimurium *slyA* coding  
558 sequence chimera was constructed using overlapping PCR. The *slyA-ydhIJK* intergenic region was  
559 amplified from *E. coli* K12 genomic DNA using primers KMp178 and KMp206, and from *S.*  
560 Typhimurium 14028s using oligonucleotides KMp177 and KMp206. The corresponding *slyA* ORF  
561 from *S. Typhimurium* was amplified with primers KMp207 and KMp181. The ORF and promoter  
562 segments were amplified along with 40bp of complementary overlapping sequence. Products from  
563 the ORF and promoter reactions were mixed 1:1 and amplified using primers KMp178 (*E. coli*) or  
564 KMp177 (*S. Typhimurium*) and KMp181 to amplify the promoter/ORF chimeras. The resulting  
565 fragment and pTH19Kr (69) were digested with *BamHI* and *HindIII* and ligated together,  
566 generating pKM05 (*E. coli* promoter) and pKM07 (*S. Typhimurium* promoter). Plasmids were  
567 transformed into *S. Typhimurium* 14028s *slyA* for gene expression analysis. The *hnsT* coding  
568 sequence was amplified from E2348/69 genomic DNA using the oligonucleotides EcoRI-hnsT-F  
569 and HindIII-hnsT-R. Both pBAD18 and the resulting PCR fragment were digested with *EcoRI* and  
570 *HindIII*, agarose gel-purified, and ligated together to generate pRW57.

571

572 **Fusaric acid resistance assays.** Cultures were grown overnight in LB broth at 37°C, then diluted  
573 1:100. Thirty microliters of this dilution were added to 270  $\mu$ l of LB containing 30  $\mu$ g/ml freshly  
574 prepared fusaric acid in 100-well BioScreen plates (GrowthCurves, Piscataway, NJ). Cultures  
575 were grown with continuous maximum shaking at 37°C and regular OD<sub>600</sub> measurements were  
576 taken on a BioScreen C MBR. Fresh 20 mg/ml stock solutions of fusaric acid were prepared in  
577 DMF (dimethyl formamide).

578

579 **NMR analysis of SlyA-salicylate.** SlyA protein for NMR analysis was prepared as an *N*-terminal  
580 6 $\times$ His-tagged protein from cells grown in M9 minimal medium supplemented with <sup>15</sup>N-  
581 ammonium chloride (Cambridge Isotope Labs, Tewksbury MA). SlyA protein expression was  
582 induced by the addition of 2 mM IPTG (isopropyl- $\beta$ -D-thiogalactopyranoside) and the protein  
583 purified to homogeneity using Ni-affinity chromatography as previously described (21), except  
584 that samples were dialyzed in 50 mM Tris-HCl, pH 8.0, 150 mM NaCl, 0.1mM EDTA, and 3 mM  
585 DTT following purification. Protein and ligand solutions for NMR experiments were prepared in  
586 25 mM sodium phosphate, 150 mM NaCl buffer at pH 7.0 containing 10% D<sub>2</sub>O. NMR spectra  
587 were collected on a Bruker DMX 500hHz spectrometer (Bruker, Billerica MA) on samples  
588 equilibrated at 35°C and consisting of 250-350  $\mu$ M <sup>15</sup>N-labeled His-SlyA in the absence or  
589 presence of 2mM sodium salicylate or 0.5mM sodium benzoate. Spectra were processed using  
590 NMR-Pipe (70) and analyzed using NMR-View (71).

591

592 **SlyA-salicylate crystallization.** SlyA was over-expressed and purified for crystallization as  
593 previously described (21), except that samples were dialyzed in 50 mM Tris-HCl, pH 8.0, 150 mM  
594 NaCl, 0.1 mM EDTA, and 3 mM DTT following purification. Cryo I and II sparse matrix

595 crystallization screens (Emerald Biosystems, Bainbridge Island, WA) were used to determine  
596 initial conditions for His-SlyA crystal formation by sitting-drop vapor diffusion in 24-well crystal  
597 trays. Equal volumes (4 $\mu$ L) of SlyA and crystallization solutions were mixed before plates were  
598 sealed and kept at room temperature. Crystals appeared within 4-7 days in 20% PEG 300, 10%  
599 glycerol, 0.1 M phosphate/citrate buffer, pH 4.2, 0.2M ammonium sulfate (condition #14).  
600 Subsequent crystal growth was performed using lab-made 20% PEG 400, 10% glycerol, 0.1 M  
601 phosphate/citrate buffer, pH 4.2, and 0.2 M ammonium sulfate. Crystallization of SlyA with  
602 sodium salicylate was achieved by adding dilutions of a 2M sodium salicylate aqueous stock  
603 solution to the protein-crystallization solution mixture. SlyA-salicylate crystals appeared within  
604 7-10 days. A single crystal appeared at a concentration of 75 mM sodium salicylate and grew to  
605 a maximum size of 500 $\mu$  x 300 $\mu$  x 150 $\mu$  (Fig. S4). This crystal was used for X-ray diffraction  
606 experiments.

607         The crystal was frozen at 100°K in its crystallization solution for diffraction data  
608 collection on GM/CA-CAT beamline 23-ID-D at the Advanced Photon Source. The space group  
609 for the crystals is P2<sub>1</sub>2<sub>1</sub>2 with two SlyA molecules in the asymmetric unit. The diffraction data  
610 were processed with HKL2000 (72). Dataset statistics are shown in Table S1. The crystal structure  
611 of the salicylate complex of SlyA was solved using a model of a previously investigated structure  
612 of apo-SlyA (unpublished data). That apo-structure was solved using the molecular replacement  
613 program, MOLREP (73) with a search model generated by applying Swiss-Model (74) and the  
614 SlyA amino acid sequence to PDB entry 2FBH (75). The structural model for the salicylate  
615 complex was refined using REFMAC-5 (76) in the CCP4 suite (77). Rfree (78) was calculated  
616 using 5% of the data in the test set. A high-resolution limit of 2.3Å was applied for the refinement,  
617 consistent with standards appropriate when the structure was solved. This is the resolution at

618 which Rmerge for the data set drops below 0.40. XtalView (79) and Coot (80) were used to  
619 examine sigma A weighted  $|F_o|-|F_c|$  and  $2|F_o|-|F_c|$  electron density maps (81). MOLSCRIPT(82),  
620 and Raster3D (83) were used to produce structural figures for this paper. Table S2 contains  
621 refinement statistics for the structure. Coordinates and structure factors have been deposited in the  
622 Protein Data Bank with identifier 3DEU.

623

624 **6×His-RovA purification.** RovA was purified using the same protocol as described previously  
625 for SlyA (17). However, overexpression cultures were grown at 24°C to  $OD_{600}=0.5$ . IPTG was  
626 added to a final concentration of 1mM, and cultures were incubated at 24°C for an additional four  
627 h before the cells were harvested by centrifugation and cell pellets stored at -80°C for the  
628 subsequent purification of RovA.

629

630 ***In vitro* transcription.** IVT assays were performed essentially as previously described (17) with  
631 the following modifications. All SlyA IVT assays were performed at 37°C. All RovA IVT assays  
632 were performed at 24°C. Where indicated, sodium salicylate was added to IVT reactions prior to  
633 the addition of SlyA or RovA. All oligonucleotides and templates used in IVT reactions are  
634 indicated in Table S6.

635

636 **RNA isolation and qRT-PCR.** RNA was purified using Trizol (Life Technologies, Carlsbad CA)  
637 according to the manufacturer's protocols. cDNA was generated using the QuantiTect Reverse  
638 Transcription Kit (Qiagen, Hilden, Germany), and quantified in a BioRad CFX96 (BioRad,  
639 Hercules CA), using SYBR Green Master Mix (84).

640 For the analysis of *pagC* expression under inducing conditions, *S. Typhimurium* cultures  
641 were grown to early stationary phase ( $OD_{600} \approx 2.0$ ) at 37°C in LB broth, then washed three times in  
642 N-minimal medium containing either 10  $\mu$ M (inducing) or 10 mM  $MgCl_2$  (non-inducing). Cultures  
643 were re-suspended in the appropriate N-minimal medium with 2mM sodium salicylate where  
644 indicated and incubated for an additional 30 min at 37°C before cells were harvested for RNA  
645 purification studies. For the complementation of *slyA* with *slyA* or *rovA* *in trans*, overnight cultures  
646 were diluted to 0.05  $OD_{600}$  and grown for two h at 24°C before adding arabinose to a final  
647 concentration of 0.02% w/v. Cultures were grown for an additional six h before harvesting RNA.

648 *Y. pseudotuberculosis* strains YPIII and YP107 were diluted from overnight cultures to  
649 0.05  $OD_{600}$  in LB and grown with shaking at 24°C. For the inhibition of H-NS via H-NST<sub>EPEC</sub>  
650 over-expression, and complementation of *rovA* with *rovA* or *slyA* *in trans*, YPIII and YP107  
651 cultures carrying either pBAD18 or pRW57 were grown for two hrs before arabinose was added  
652 to a final concentration of 0.02% w/v. Cultures were grown for an additional six hrs before  
653 harvesting RNA. For *slyA/rovA* complementation studies, *rpoAYS* primers targeting *rpoA* were  
654 used as loading controls, as *rpoA* is sufficiently conserved between the two species as to allow use  
655 of the same primers.

656

## 657 **Acknowledgments**

658 The National Institutes of Health provided support to FCF (AI39557, AI44486,  
659 AI118962, AI112640) and SJL (A148622). GM/CA@APS has been funded in whole or in part  
660 with Federal funds from the National Cancer Institute (ACB-12002) and the National Institute of  
661 General Medical Sciences (AGM-12006). This research used resources of the Advanced Photon

662 Source, a U.S. Department of Energy (DOE) Office of Science User Facility operated for the  
663 DOE Office of Science by Argonne National Laboratory under Contract No. DE-AC02-  
664 06CH11357. We thank Eric Larson for helpful discussions and suggestions. We also thank  
665 Catherine Eakin and Ponni Rajagopal for assistance with protein purification and crystal growth,  
666 Petra Dersch for kindly providing *Y. pseudotuberculosis* YPIII and YP107, and Ralph Isberg for  
667 providing *Y. pseudotuberculosis* IP32953. Finally, we thank Dr. Rachel Klevit for use of her  
668 NMR facilities to collect spectra of SlyA-salicylate complexes.

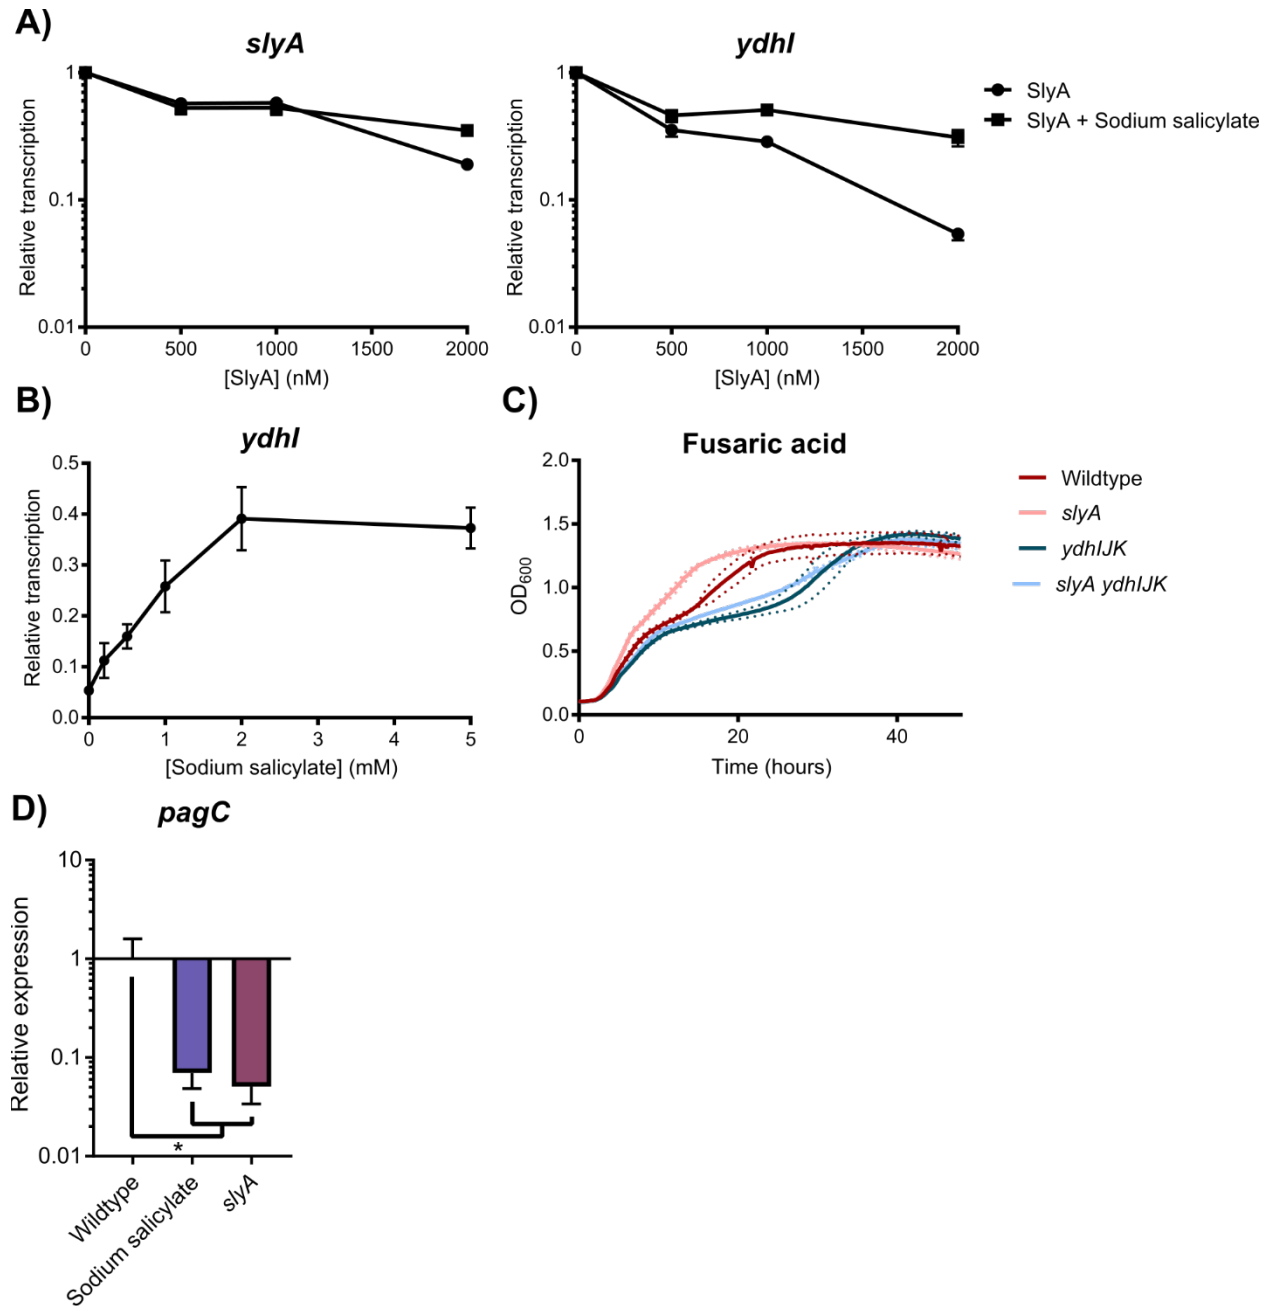

669

670 **Figure 1. SlyA retains the ancestral functions of MarR family TFs.** To determine whether

671 SlyA is an autorepressor like other members of the MarR family, *in vitro* transcription (IVT)

672 assays were performed on supercoiled template DNA containing *slyA* and the divergently

673 expressed *ydhI* gene in the presence of increasing SlyA concentrations (A). Reactions were

674 performed with or without 2mM sodium salicylate to determine whether SlyA is inhibited by



675 small aromatic carboxylate compounds like other MarR TFs. (IVT analysis of SlyA-mediated  
676 regulation of *pagC* is shown in Fig. S1.) To determine whether SlyA exhibits a dose-dependent  
677 response to salicylate, IVT assays were performed on *ydhI* in the presence of 2 $\mu$ M SlyA and  
678 increasing concentrations of sodium salicylate (B). Wildtype, *slyA*, *ydhIJK*, and *slyA ydhIJK*  
679 cultures were grown in the presence of 30  $\mu$ g/ml fusaric acid and cell density (OD<sub>600</sub>) measured  
680 over time to determine if *ydhIJK* encodes a functional anti-microbial efflux pump (C). Data  
681 represent the mean (solid line) of three independent experiments, each consisting of three  
682 replicates. Dashed lines represent the SD. (Growth curves in the absence of fusaric acid is shown  
683 in Fig. S2.) To determine whether salicylate also inhibits SlyA counter-silencing activity, *pagC*  
684 transcripts were quantified by qRT-PCR from early stationary phase (OD<sub>600</sub>≈2.0) cultures in  
685 minimal N-medium containing 10  $\mu$ M MgCl<sub>2</sub> in the presence or absence of 2 mM sodium  
686 salicylate (D). Transcript levels are normalized to *rpoD*, and data represent the mean  $\pm$  SD; n $\geq$ 3.  
687 Asterisk indicates P=0.05.

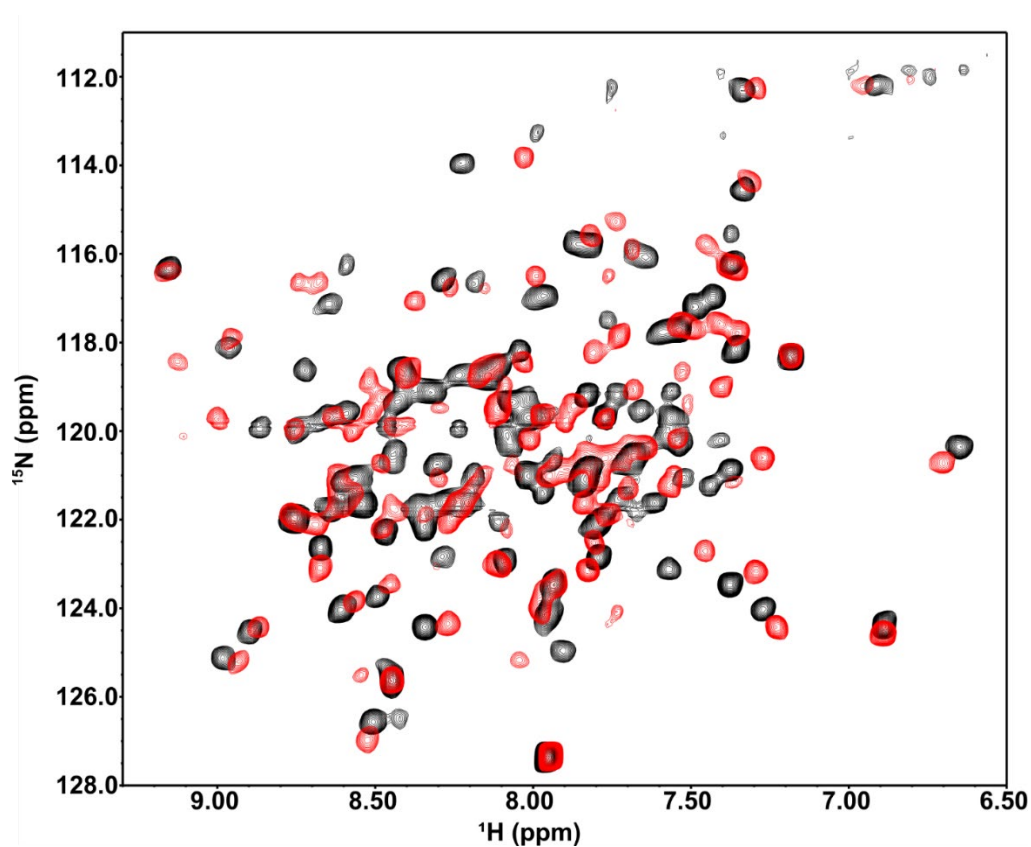

689 **Figure 2. SlyA undergoes significant structural alterations upon salicylate binding.** To  
690 assess salicylate-induced SlyA structural changes,  $^1\text{H}$ ,  $^{15}\text{N}$ -TROSY NMR spectroscopy was  
691 performed on 0.3mM uniformly-labelled  $^{15}\text{N}$ -SlyA in the absence (black) or presence (red) of  
692 2mM sodium salicylate. (Differential DNA Footprinting Analysis, or DDFA, of the SlyA-DNA  
693 interaction in the presence or absence of salicylate is shown in Figure 2 – figure supplement 1  
694 Ligand binding analysis is shown in Figure 2 – figure supplement 2.)

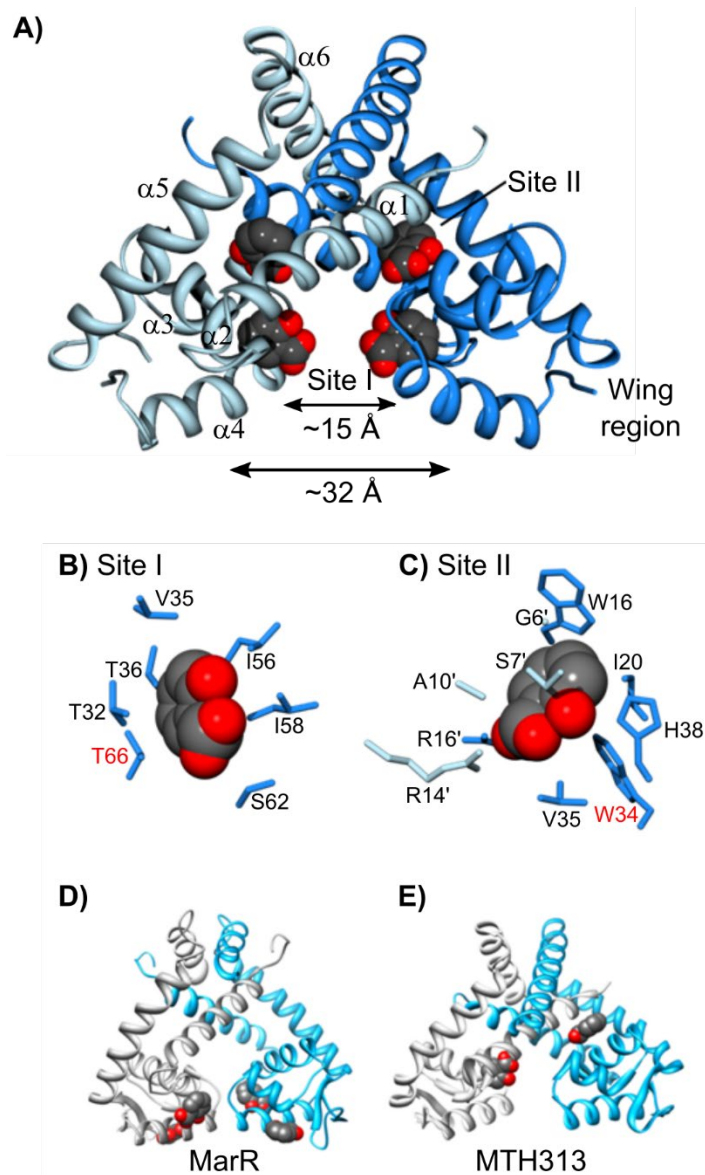

695

696 **Figure 3. Structure of the SlyA dimer bound to salicylate.** The crystal structure of the SlyA  
697 dimer with salicylate bound at sites I and II was determined at a resolution of 2.3Å (A). Residues  
698 involved in coordinating bound salicylates are shown for sites I (B) and II (C) Residues required  
699 for salicylate-mediated inhibition of SlyA (see Fig. 4) are highlighted in red. The structures of  
700 salicylate-bound MarR (D; PDB entry 1JGS) and MTH313 (E; PDB entry 3BPX) dimers are  
701 shown for comparison. (An image of the SlyA-salicylate crystal is shown in Figure 3 - figure  
702 supplement 1.)

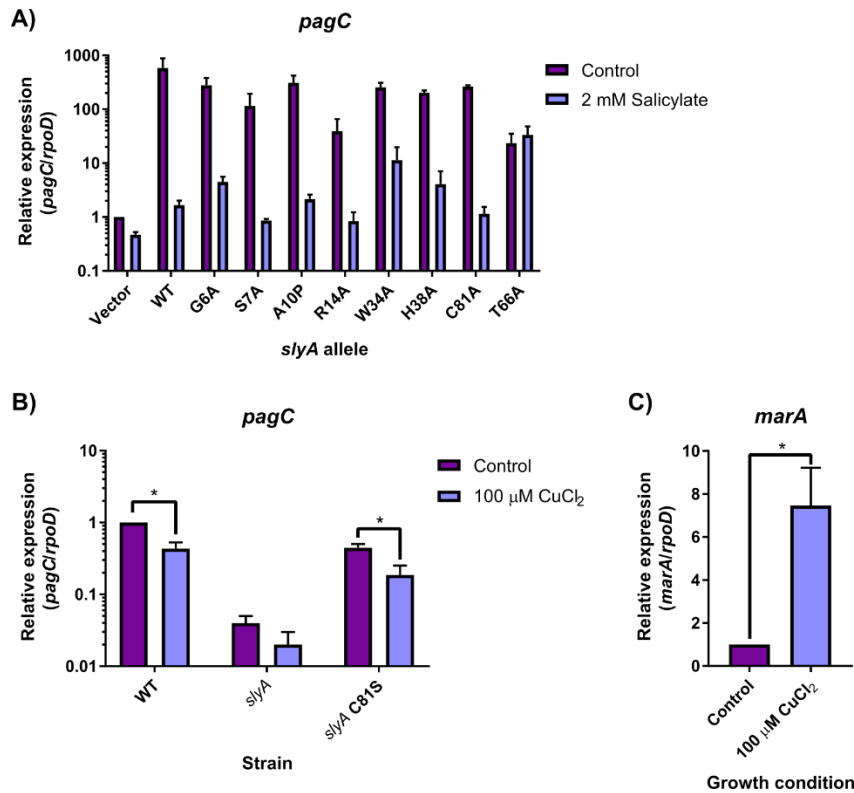

703

704 **Figure 4. Genetic analyses of allosteric inhibition of SlyA.** Selected residues involved in  
705 coordinating SlyA-bound salicylate were mutated in pSL2143, a plasmid expressing *slyA* from  
706 its native promoter, and assayed for their ability to restore counter-silencing in a chromosomal  
707 *slyA* mutant. Cultures were induced in 10 $\mu$ M  $\text{MgCl}_2$ -containing medium in the presence or  
708 absence of 2mM sodium salicylate (A). Levels of *pagC* mRNA were quantified by qRT-PCR  
709 and normalized to *rpoD*. The mutant strain carrying the empty pWSK29 vector was included as a  
710 control. To determine if SlyA was directly inhibited by  $\text{Cu}^{2+}$  via C81, *pagC* expression was  
711 quantified in wild-type or isogenic *slyA* and *slyA* C81S mutant *S. Typhimurium* strains in  
712 inducing medium in the presence or absence of 100 $\mu$ M  $\text{CuCl}_2$  (B). To confirm that  $\text{Cu}^{2+}$ -  
713 mediated inhibition occurs under these conditions, *marA* transcription was also quantified in the  
714 presence or absence of 100 $\mu$ M  $\text{CuCl}_2$ . Data represent the mean  $\pm$  SD; n=3. Asterisks indicate  $P <$   
715 0.005.

Evolution of SlyA Transcription Factors

Will, et al.

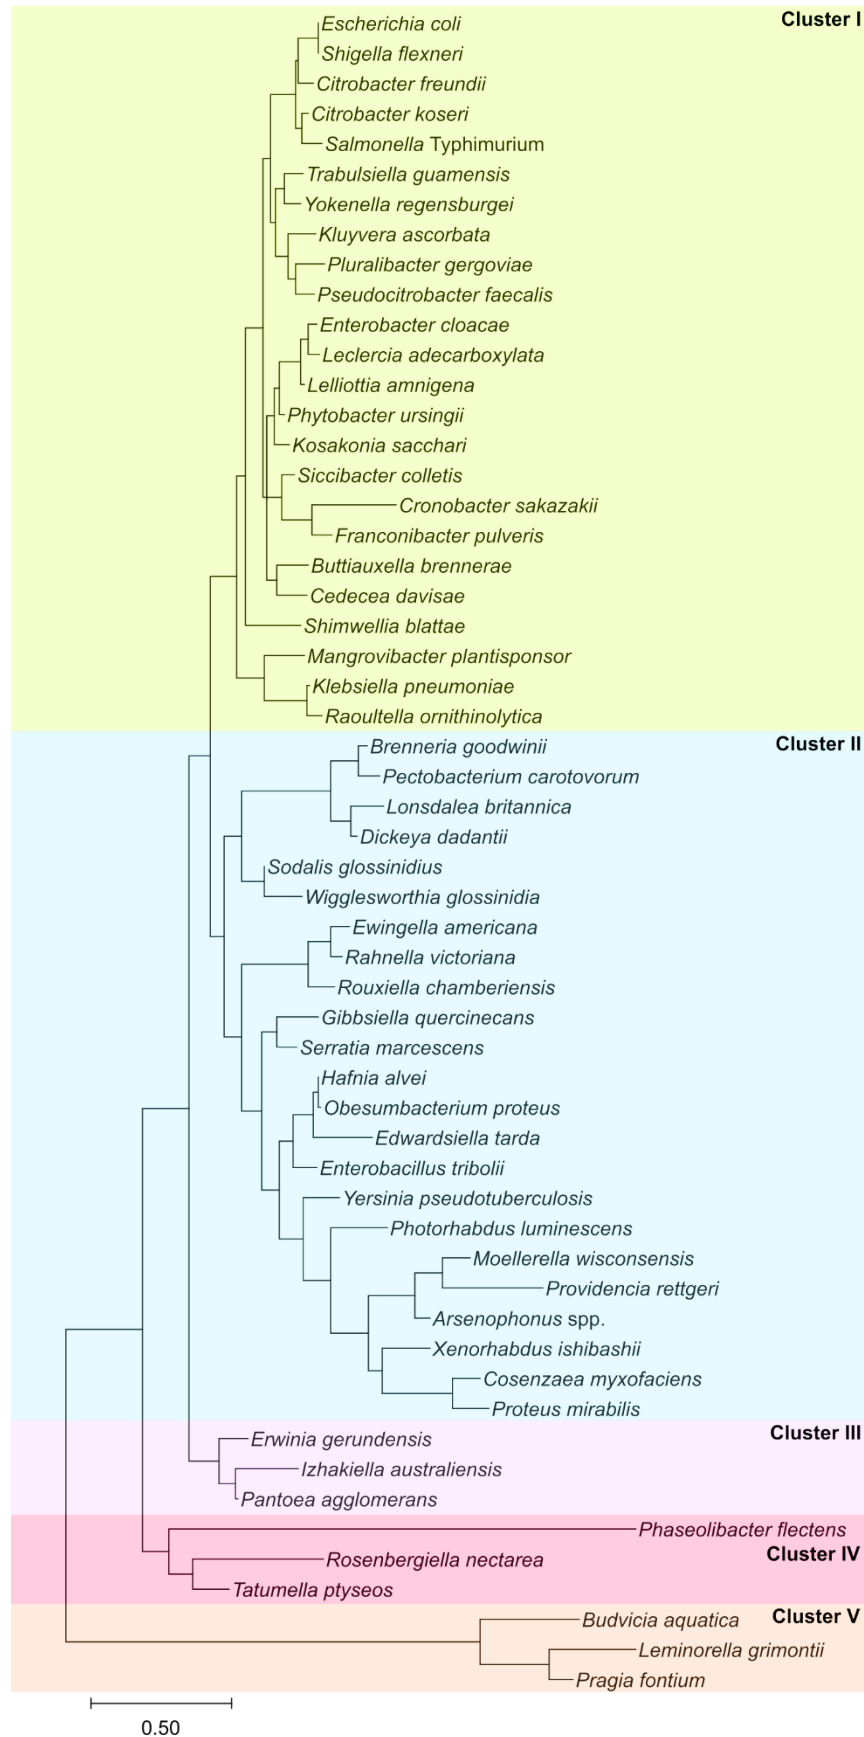

716

717 **Figure 5. The SlyA TF lineage in *Enterobacteriaceae*.** The evolutionary history of the SlyA TF  
718 lineage was inferred using the Maximum Likelihood method and the Le-Gascuel model (85)  
719 with Mega X software (86). The tree is drawn to scale with the branch length representing the  
720 number of substitutions per site. The *slyA* genes have evolved in five major phylogenetic  
721 clusters: cluster I comprises most enteric species, including *S. Typhimurium* and *E. coli*; cluster  
722 II is heterogeneous, containing more distantly related pathogenic species from *Proteus* and  
723 *Yersinia*, as well as endosymbionts like *Sodalis*; clusters III and IV contain several plant-  
724 associated bacteria, such as *Pantoea agglomerans* and *Phaseolibacter flectens*; cluster V is  
725 comprised of hydrogen sulfide-producing bacteria. (A multiple sequence alignment of selected  
726 SlyA orthologs can be found in Figure 5 - figure supplement 1).

Evolution of SlyA Transcription Factors

Will, et al.

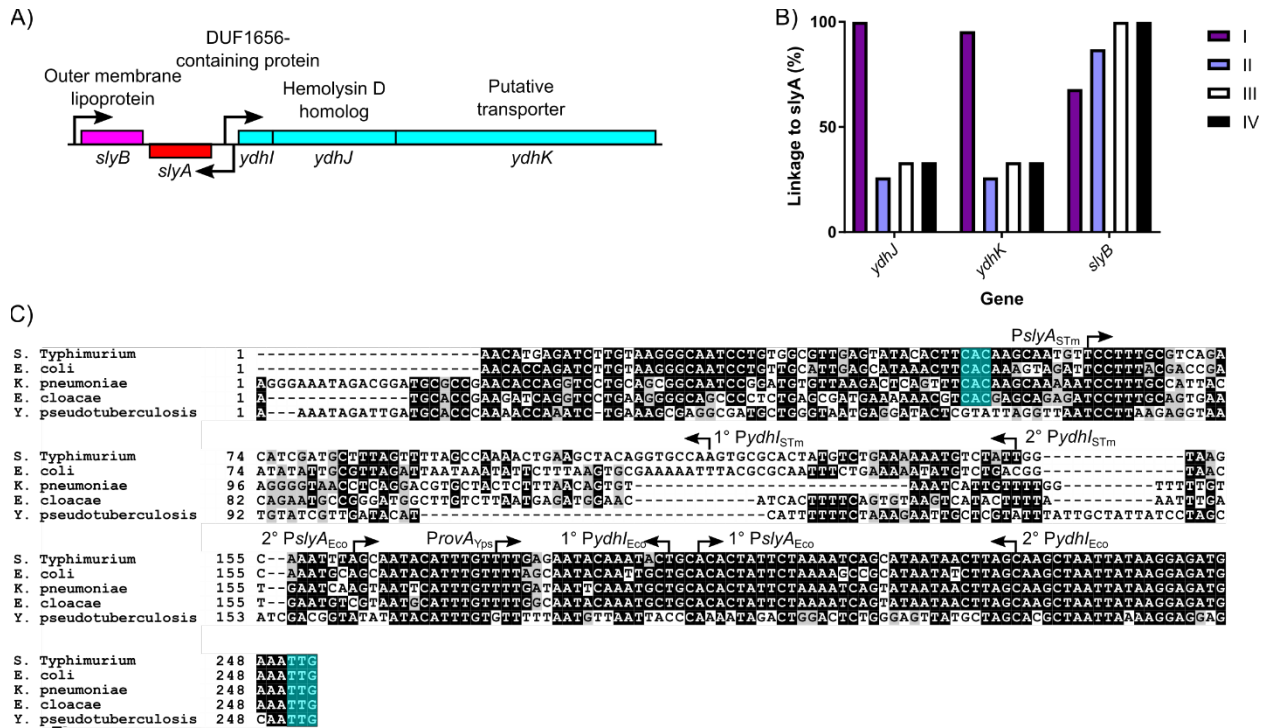

727

728 **Figure 6. Genetic linkage and *cis*-regulatory evolution of *slyA* in *Enterobacteriaceae*.** The  
729 *slyA* region of *S. Typhimurium* and closely related enteric species is diagrammed in (A). Arrows  
730 indicate TSSs, and boxes represent protein coding sequences. The *ydhIJK* efflux pump operon is  
731 transcribed divergently from *slyA*. A protein of unknown function is encoded by *ydhI*, and *ydhJ*  
732 and *ydhK* encode a hemolysin D/EmrA homolog and a transporter protein, respectively. *slyB*  
733 encodes a putative outer membrane lipoprotein, transcribed convergently to *slyA*. The linkage of  
734 *slyA* to *slyB*, *ydhJ*, and *ydhK*, is determined for all of the species from clusters I-IV shown in Fig.  
735 5 (B). Species from cluster V do not exhibit linkage to these genes and are not shown. A multiple  
736 sequence alignment of the *slyA* promoter region from the closely-related species *S.*  
737 *Typhimurium*, *E. coli*, *K. pneumoniae*, and *E. cloacae*, as well as more distantly-related *Y.*  
738 *pseudotuberculosis* (C). Arrows indicate the position and orientation of previously characterized  
739 TSSs (30, 55, 57). Where multiple TSSs have been identified, the primary (1°) and secondary  
740 (2°) start sites are indicated. The *slyA* (positions 248-250) and *ydhI* (positions 47-70, dependent

741 on the species) start codons are highlighted in teal when present. (Alignments of this region from  
742 representative species of *Salmonella*, *Escherichia*, and *Yersinia* are shown in Figure 6 - figure  
743 supplement 1. A phylogenetic analysis of the *slyA* promoter region of a subset of genera is  
744 shown in Figure 6 - figure supplement 2.)

745



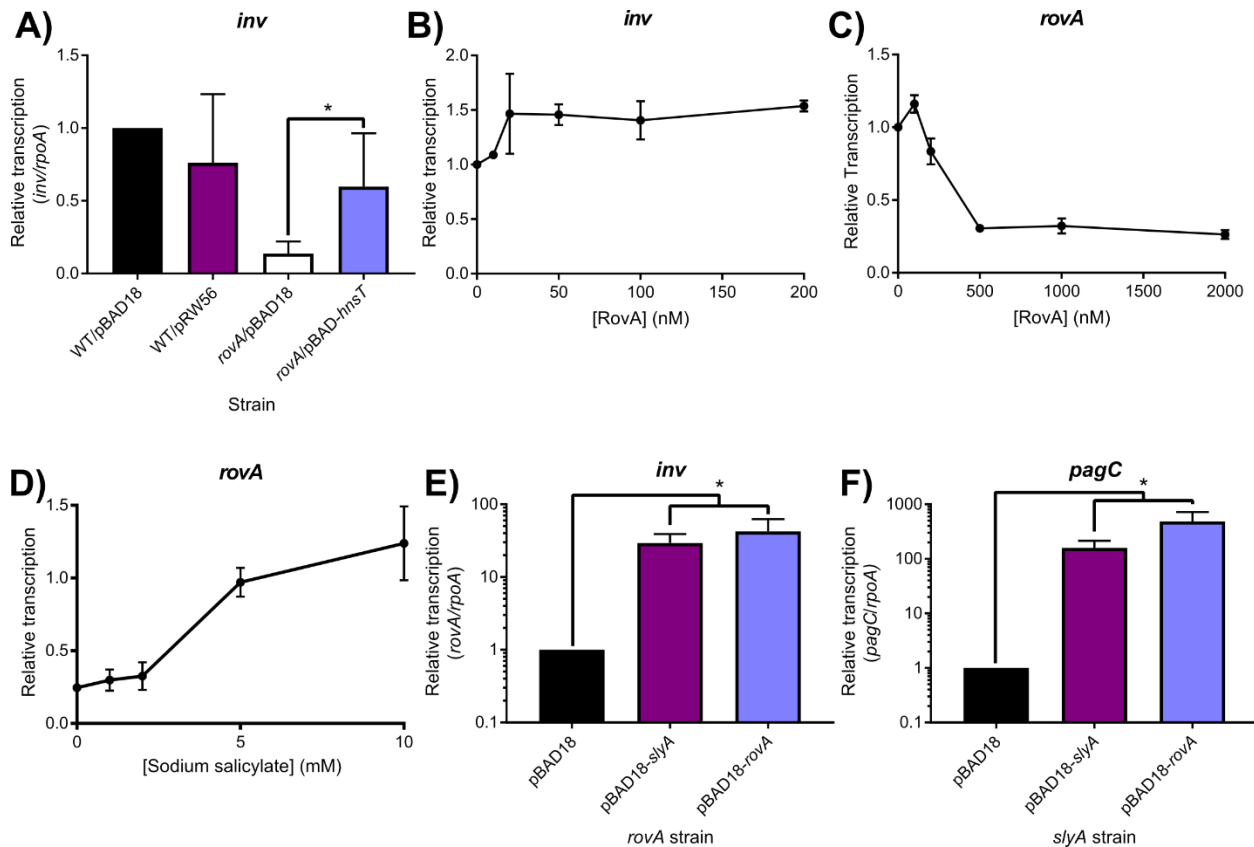

746

747 **Figure 7. Environmentally-responsive repressing and counter-silencing functions are**

748 **conserved in the SlyA TF lineage.** To determine whether RovA functions as a counter-silencer

749 in *Y. pseudotuberculosis*, transcription of the Rov-regulated *inv* gene was quantified by qRT-

750 PCR in wildtype or *rovA* mutant strains expressing *hnsT*<sub>EPEC</sub>, which inhibits H-NS (A). Although

751 *inv* expression is decreased in a *rovA* mutant strain, expression is fully restored by the inhibition

752 of H-NS, indicating that RovA functions as a counter-silencer. IVT assays of the *inv* regulatory

753 region in the presence of increasing RovA concentrations detected only a minimal impact on

754 transcription levels, suggesting that RovA is unlikely to function as a classical activator (B). IVT

755 assays of *rovA* in the presence of increasing RovA concentrations demonstrate that RovA

756 functions as an autorepressor (C). RovA remains sensitive to inhibition by small aromatic

757 carboxylate molecules, as increasing concentrations of sodium salicylate inhibited RovA-

758 mediated *rovA* repression in IVT assays. Reciprocal complementation studies were performed by

759 providing either *rovA* or *slyA in trans* expressed from the arabinose-inducible pBAD18 vector in  
760 *rovA* or *slyA* mutant *Y. pseudotuberculosis* and *S. Typhimurium* strains, respectively, and  
761 measuring transcription of *inv* and *pagC* via qRT-PCR. Transcript levels are normalized to *rpoA*  
762 in both species, and data represent the mean  $\pm$  SD; n=3. Asterisks indicate  $P < 0.05$ .

763

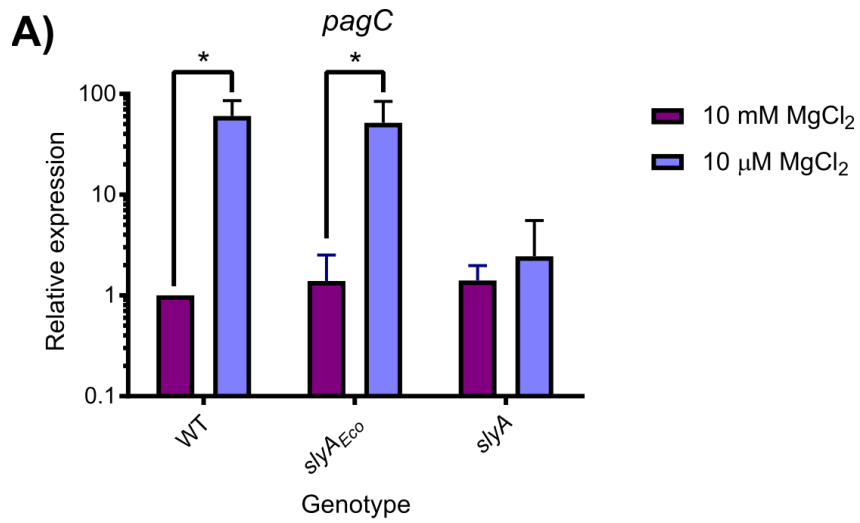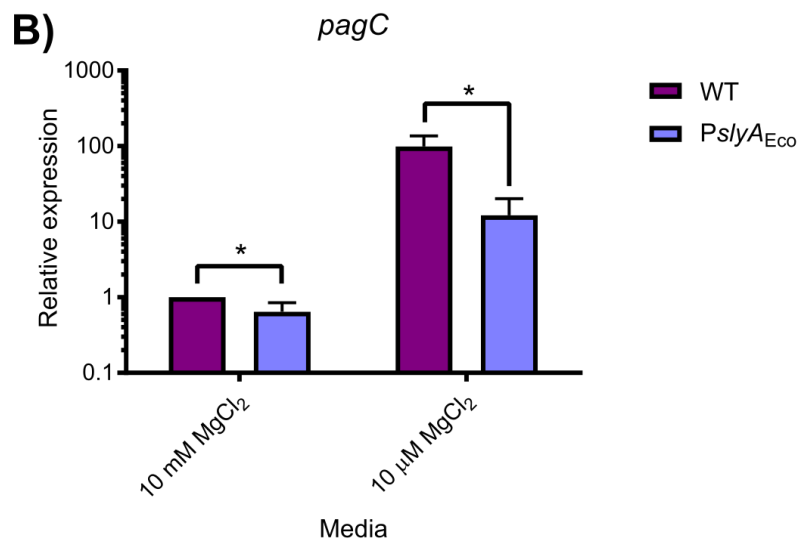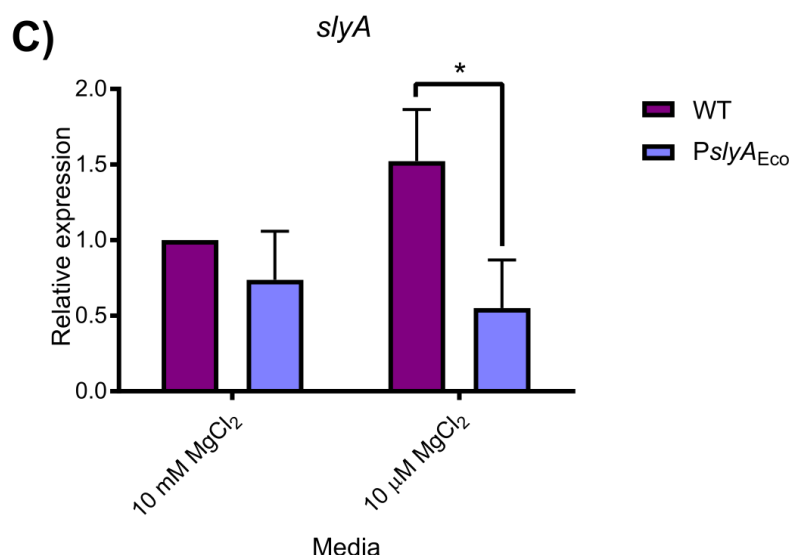

765 **Figure 8. *S. Typhimurium* SlyA is a more effective counter-silencer than *E. coli* SlyA due to**  
766 **higher expression levels.** Expression of the SlyA counter-silenced *pagC* gene was measured by  
767 qRT-PCR in *S. Typhimurium* strains encoding wildtype *slyA*, *slyA<sub>Eco</sub>*, or mutant *slyA* under either  
768 inducing (10  $\mu$ M MgCl<sub>2</sub>) or non-inducing (10mM MgCl<sub>2</sub>) conditions (A). Expression of *pagC*  
769 (B) and *slyA* (C) was compared in *S. Typhimurium* strains in which *slyA* transcription was driven  
770 by either the wildtype (WT) or *E. coli* (*P<sub>slyA<sub>Eco</sub></sub>*) *slyA* promoter. Transcript levels are normalized  
771 to *rpoD* and data represent the mean  $\pm$  SD; n=3. Asterisks indicate  $P \leq 0.05$ . (A comparative  
772 analysis of a *P<sub>slyA<sub>Eco</sub></sub>-roxA* chimera is shown in Figure 8 - figure supplement 1.)

773 **References**

- 774 1. Fang FC, Frawley ER, Tapscott T, Vázquez-Torres A. 2016. Discrimination and  
775 integration of stress signals by pathogenic bacteria. *Cell Host Microbe* 20:144-153.
- 776 2. Ohno S. 1970. *Evolution by Gene Duplication*. Springer, New York.
- 777 3. Brenner SE, Hubbard T, Murzin A, Chothia C. 1995. Gene duplications in *H. influenzae*.  
778 *Nature* 378:140.
- 779 4. Teichmann SA, Park J, Chothia C. 1998. Structural assignments to the *Mycoplasma*  
780 *genitalium* proteins show extensive gene duplications and domain rearrangements. *Proc*  
781 *Natl Acad Sci U S A* 95:14658-63.
- 782 5. Teichmann SA, Babu MM. 2004. Gene regulatory network growth by duplication. *Nat*  
783 *Genet* 36:492-6.
- 784 6. Pérez-Rueda E, Collado-Vides J, Segovia L. 2004. Phylogenetic distribution of DNA-  
785 binding transcription factors in bacteria and archaea. *Comput Biol Chem* 28:341-50.
- 786 7. Grove A. 2017. Regulation of metabolic pathways by MarR family transcription factors.  
787 *Comput Struct Biotechnol J* 15:366-371.
- 788 8. Alekshun MN, Levy SB, Mealy TR, Seaton BA, Head JF. 2001. The crystal structure of  
789 MarR, a regulator of multiple antibiotic resistance, at 2.3 Å resolution. *Nat Struct Biol*  
790 8:710-4.
- 791 9. Seoane AS, Levy SB. 1995. Characterization of MarR, the repressor of the multiple  
792 antibiotic resistance (*mar*) operon in *Escherichia coli*. *J Bacteriol* 177:3414-9.
- 793 10. Martin RG, Rosner JL. 1995. Binding of purified multiple antibiotic-resistance repressor  
794 protein (MarR) to *mar* operator sequences. *Proc Natl Acad Sci U S A* 92:5456-60.
- 795 11. George AM, Levy SB. 1983. Amplifiable resistance to tetracycline, chloramphenicol, and  
796 other antibiotics in *Escherichia coli*: involvement of a non-plasmid-determined efflux of  
797 tetracycline. *J Bacteriol* 155:531-40.
- 798 12. Cohen SP, Levy SB, Foulds J, Rosner JL. 1993. Salicylate induction of antibiotic  
799 resistance in *Escherichia coli*: activation of the *mar* operon and a *mar*-independent  
800 pathway. *J Bacteriol* 175:7856-62.
- 801 13. Wilkinson SP, Grove A. 2006. Ligand-responsive transcriptional regulation by members  
802 of the MarR family of winged helix proteins. *Curr Issues Mol Biol* 8:51-62.
- 803 14. Alekshun MN, Levy SB. 1999. The *mar* regulon: multiple resistance to antibiotics and  
804 other toxic chemicals. *Trends Microbiol* 7:410-3.
- 805 15. Hao Z, Lou H, Zhu R, Zhu J, Zhang D, Zhao BS, Zeng S, Chen X, Chan J, He C, Chen  
806 PR. 2014. The multiple antibiotic resistance regulator MarR is a copper sensor in  
807 *Escherichia coli*. *Nat Chem Biol* 10:21-8.
- 808 16. Zhu R, Hao Z, Lou H, Song Y, Zhao J, Chen Y, Zhu J, Chen PR. 2017. Structural  
809 characterization of the DNA-binding mechanism underlying the copper(II)-sensing MarR  
810 transcriptional regulator. *J Biol Inorg Chem* 22:685-693.
- 811 17. Will WR, Bale DH, Reid PJ, Libby SJ, Fang FC. 2014. Evolutionary expansion of a  
812 regulatory network by counter-silencing. *Nat Commun* 5:5270.
- 813 18. Will WR, Navarre WW, Fang FC. 2015. Integrated circuits: how transcriptional silencing  
814 and counter-silencing facilitate bacterial evolution. *Curr Opin Microbiol* 23:8-13.
- 815 19. Lithgow JK, Haider F, Roberts IS, Green J. 2007. Alternate SlyA and H-NS  
816 nucleoprotein complexes control *hlyE* expression in *Escherichia coli* K-12. *Mol*  
817 *Microbiol* 66:685-98.

- 818 20. Perez JC, Latifi T, Groisman EA. 2008. Overcoming H-NS-mediated transcriptional  
819 silencing of horizontally acquired genes by the PhoP and SlyA proteins in *Salmonella*  
820 *enterica*. J Biol Chem 283:10773-83.
- 821 21. Navarre WW, Halsey TA, Walthers D, Frye J, McClelland M, Potter JL, Kenney LJ,  
822 Gunn JS, Fang FC, Libby SJ. 2005. Co-regulation of *Salmonella enterica* genes required  
823 for virulence and resistance to antimicrobial peptides by SlyA and PhoP/PhoQ. Mol  
824 Microbiol 56:492-508.
- 825 22. García Véscovi E, Soncini FC, Groisman EA. 1996. Mg<sup>2+</sup> as an extracellular signal:  
826 environmental regulation of *Salmonella* virulence. Cell 84:165-74.
- 827 23. Prost LR, Daley ME, Le Sage V, Bader MW, Le Moual H, Klevit RE, Miller SI. 2007.  
828 Activation of the bacterial sensor kinase PhoQ by acidic pH. Mol Cell 26:165-74.
- 829 24. Bader MW, Sanowar S, Daley ME, Schneider AR, Cho U, Xu W, Klevit RE, Le Moual  
830 H, Miller SI. 2005. Recognition of antimicrobial peptides by a bacterial sensor kinase.  
831 Cell 122:461-72.
- 832 25. Thomson NR, Cox A, Bycroft BW, Stewart GS, Williams P, Salmond GP. 1997. The  
833 Rap and Hor proteins of *Erwinia*, *Serratia* and *Yersinia*: a novel subgroup in a growing  
834 superfamily of proteins regulating diverse physiological processes in bacterial pathogens.  
835 Mol Microbiol 26:531-44.
- 836 26. Dale C, Maudlin I. 1999. *Sodalis* gen. nov. and *Sodalis glossinidius* sp. nov., a  
837 microaerophilic secondary endosymbiont of the tsetse fly *Glossina morsitans morsitans*.  
838 Int J Syst Bacteriol 49 Pt 1:267-75.
- 839 27. Akman L, Rio RV, Beard CB, Aksoy S. 2001. Genome size determination and coding  
840 capacity of *Sodalis glossinidius*, an enteric symbiont of tsetse flies, as revealed by  
841 hybridization to *Escherichia coli* gene arrays. J Bacteriol 183:4517-25.
- 842 28. Cathelyn JS, Crosby SD, Lathem WW, Goldman WE, Miller VL. 2006. RovA, a global  
843 regulator of *Yersinia pestis*, specifically required for bubonic plague. Proc Natl Acad Sci  
844 U S A 103:13514-9.
- 845 29. Cathelyn JS, Ellison DW, Hinchliffe SJ, Wren BW, Miller VL. 2007. The RovA regulons  
846 of *Yersinia enterocolitica* and *Yersinia pestis* are distinct: evidence that many RovA-  
847 regulated genes were acquired more recently than the core genome. Mol Microbiol  
848 66:189-205.
- 849 30. Heroven AK, Nagel G, Tran HJ, Parr S, Dersch P. 2004. RovA is autoregulated and  
850 antagonizes H-NS-mediated silencing of invasin and *rovA* expression in *Yersinia*  
851 *pseudotuberculosis*. Mol Microbiol 53:871-88.
- 852 31. Haque MM, Kabir MS, Aini LQ, Hirata H, Tsuyumu S. 2009. SlyA, a MarR family  
853 transcriptional regulator, is essential for virulence in *Dickeya dadantii* 3937. J Bacteriol  
854 191:5409-18.
- 855 32. Weatherspoon-Griffin N, Wing HJ. 2016. Characterization of SlyA in *Shigella flexneri*  
856 Identifies a novel role in virulence. Infect Immun 84:1073-1082.
- 857 33. Dolan KT, Duguid EM, He C. 2011. Crystal structures of SlyA protein, a master  
858 virulence regulator of *Salmonella*, in free and DNA-bound states. J Biol Chem  
859 286:22178-85.
- 860 34. Curran TD, Abacha F, Hibberd SP, Rolfe MD, Lacey MM, Green J. 2017. Identification  
861 of new members of the *Escherichia coli* K-12 MG1655 SlyA regulon. Microbiology  
862 163:400-409.

- 863 35. Gama-Castro S, Salgado H, Santos-Zavaleta A, Ledezma-Tejeida D, Muñiz-Rascado L,  
864 García-Sotelo JS, Alquicira-Hernández K, Martínez-Flores I, Pannier L, Castro-  
865 Mondragón JA, Medina-Rivera A, Solano-Lira H, Bonavides-Martínez C, Pérez-Rueda  
866 E, Alquicira-Hernández S, Porrón-Sotelo L, López-Fuentes A, Hernández-Koutoucheva  
867 A, Del Moral-Chávez V, Rinaldi F, Collado-Vides J. 2016. RegulonDB version 9.0: high-  
868 level integration of gene regulation, coexpression, motif clustering and beyond. *Nucleic*  
869 *Acids Res* 44:D133-43.
- 870 36. Perera IC, Grove A. 2010. Molecular mechanisms of ligand-mediated attenuation of  
871 DNA binding by MarR family transcriptional regulators. *J Mol Cell Biol* 2:243-54.
- 872 37. Octavia S, Lan R. 2014. The Family Enterobacteriaceae, p 225-286. *In* Rosenberg E,  
873 DeLong EF, Lory S, Stackebrandt E, Thompson F (ed), *The Prokaryotes:*  
874 *Gammaproteobacteria*. Springer Berlin Heidelberg, Berlin, Heidelberg.
- 875 38. Lomovskaya O, Lewis K. 1992. Emr, an *Escherichia coli* locus for multidrug resistance.  
876 *Proc Natl Acad Sci U S A* 89:8938-42.
- 877 39. Lomovskaya O, Lewis K, Matin A. 1995. EmrR is a negative regulator of the *Escherichia*  
878 *coli* multidrug resistance pump EmrAB. *J Bacteriol* 177:2328-34.
- 879 40. Ellison DW, Miller VL. 2006. H-NS represses *inv* transcription in *Yersinia enterocolitica*  
880 through competition with RovA and interaction with YmoA. *J Bacteriol* 188:5101-12.
- 881 41. Revell PA, Miller VL. 2000. A chromosomally encoded regulator is required for  
882 expression of the *Yersinia enterocolitica inv* gene and for virulence. *Mol Microbiol*  
883 35:677-85.
- 884 42. Tran HJ, Heroven AK, Winkler L, Spreter T, Beatrix B, Dersch P. 2005. Analysis of  
885 RovA, a transcriptional regulator of *Yersinia pseudotuberculosis* virulence that acts  
886 through antirepression and direct transcriptional activation. *J Biol Chem* 280:42423-32.
- 887 43. Shi X, Bennett GN. 1994. Plasmids bearing *hfq* and the *hns*-like gene *stpA* complement  
888 *hns* mutants in modulating arginine decarboxylase gene expression in *Escherichia coli*. *J*  
889 *Bacteriol* 176:6769-75.
- 890 44. Sonden B, Uhlin BE. 1996. Coordinated and differential expression of histone-like  
891 proteins in *Escherichia coli*: regulation and function of the H-NS analog StpA. *EMBO J*  
892 15:4970-80.
- 893 45. Williamson HS, Free A. 2005. A truncated H-NS-like protein from enteropathogenic  
894 *Escherichia coli* acts as an H-NS antagonist. *Mol Microbiol* 55:808-27.
- 895 46. McVicker G, Sun L, Sohanpal BK, Gashi K, Williamson RA, Plumbridge J, Blomfield  
896 IC. 2011. SlyA protein activates *fimB* gene expression and type 1 fimbriation in  
897 *Escherichia coli* K-12. *J Biol Chem* 286:32026-35.
- 898 47. Wyborn NR, Stapleton MR, Norte VA, Roberts RE, Grafton J, Green J. 2004. Regulation  
899 of *Escherichia coli* hemolysin E expression by H-NS and *Salmonella* SlyA. *J Bacteriol*  
900 186:1620-8.
- 901 48. Corbett D, Bennett HJ, Askar H, Green J, Roberts IS. 2007. SlyA and H-NS regulate  
902 transcription of the *Escherichia coli* K5 capsule gene cluster, and expression of *slyA* in  
903 *Escherichia coli* is temperature-dependent, positively autoregulated, and independent of  
904 H-NS. *J Biol Chem* 282:33326-35.
- 905 49. Saridakis V, Shahinas D, Xu X, Christendat D. 2008. Structural insight on the mechanism  
906 of regulation of the MarR family of proteins: high-resolution crystal structure of a  
907 transcriptional repressor from *Methanobacterium thermoautotrophicum*. *J Mol Biol*  
908 377:655-67.



- 909 50. Hong M, Fuangthong M, Helmann JD, Brennan RG. 2005. Structure of an OhrR-*ohrA*  
910 operator complex reveals the DNA binding mechanism of the MarR family. *Mol Cell*  
911 20:131-41.
- 912 51. Sabater-Muñoz B, Toft C, Alvarez-Ponce D, Fares MA. 2017. Chance and necessity in  
913 the genome evolution of endosymbiotic bacteria of insects. *ISME J* 11:1291-1304.
- 914 52. Zou L, Zeng Q, Lin H, Gyaneshwar P, Chen G, Yang CH. 2012. SlyA regulates type III  
915 secretion system (T3SS) genes in parallel with the T3SS master regulator HrpL in  
916 *Dickeya dadantii* 3937. *Appl Environ Microbiol* 78:2888-95.
- 917 53. Nicholson R, Hammerschmidt R. 1992. Phenolic-compounds and their role in disease  
918 resistance. *Annual Review of Phytopathology* 30:369-389.
- 919 54. Salgado H, Peralta-Gil M, Gama-Castro S, Santos-Zavaleta A, Muñoz-Rascado L, García-  
920 Sotelo JS, Weiss V, Solano-Lira H, Martínez-Flores I, Medina-Rivera A, Salgado-Osorio  
921 G, Alquicira-Hernández S, Alquicira-Hernández K, López-Fuentes A, Porrón-Sotelo L,  
922 Huerta AM, Bonavides-Martínez C, Balderas-Martínez YI, Pannier L, Olvera M,  
923 Labastida A, Jiménez-Jacinto V, Vega-Alvarado L, Del Moral-Chávez V, Hernández-  
924 Alvarez A, Morett E, Collado-Vides J. 2013. RegulonDB v8.0: omics data sets,  
925 evolutionary conservation, regulatory phrases, cross-validated gold standards and more.  
926 *Nucleic Acids Res* 41:D203-13.
- 927 55. Kröger C, Colgan A, Srikumar S, Händler K, Sivasankaran SK, Hammarlöf DL, Canals  
928 R, Grissom JE, Conway T, Hokamp K, Hinton JC. 2013. An infection-relevant  
929 transcriptomic compendium for *Salmonella enterica* serovar Typhimurium. *Cell Host*  
930 *Microbe* 14:683-95.
- 931 56. Lawrenz MB, Miller VL. 2007. Comparative analysis of the regulation of *rovA* from the  
932 pathogenic yersiniae. *J Bacteriol* 189:5963-75.
- 933 57. Thomason MK, Bischler T, Eisenbart SK, Förstner KU, Zhang A, Herbig A, Nieselt K,  
934 Sharma CM, Storz G. 2015. Global transcriptional start site mapping using differential  
935 RNA sequencing reveals novel antisense RNAs in *Escherichia coli*. *J Bacteriol* 197:18-  
936 28.
- 937 58. Osborne SE, Walthers D, Tomljenovic AM, Mulder DT, Silphaduang U, Duong N,  
938 Lowden MJ, Wickham ME, Waller RF, Kenney LJ, Coombes BK. 2009. Pathogenic  
939 adaptation of intracellular bacteria by rewiring a *cis*-regulatory input function. *Proc Natl*  
940 *Acad Sci U S A* 106:3982-7.
- 941 59. Bölin I, Norlander L, Wolf-Watz H. 1982. Temperature-inducible outer membrane  
942 protein of *Yersinia pseudotuberculosis* and *Yersinia enterocolitica* is associated with the  
943 virulence plasmid. *Infect Immun* 37:506-12.
- 944 60. Quade N, Mendonca C, Herbst K, Heroven AK, Ritter C, Heinz DW, Dersch P. 2012.  
945 Structural basis for intrinsic thermosensing by the master virulence regulator RovA of  
946 *Yersinia*. *J Biol Chem* 287:35796-803.
- 947 61. Datsenko KA, Wanner BL. 2000. One-step inactivation of chromosomal genes in  
948 *Escherichia coli* K-12 using PCR products. *Proc Natl Acad Sci U S A* 97:6640-5.
- 949 62. Stringer AM, Singh N, Yermakova A, Petrone BL, Amarasinghe JJ, Reyes-Diaz L,  
950 Mantis NJ, Wade JT. 2012. FRUIT, a scar-free system for targeted chromosomal  
951 mutagenesis, epitope tagging, and promoter replacement in *Escherichia coli* and  
952 *Salmonella enterica*. *PLoS One* 7:e44841.



- 953 63. Kingsley RA, Reissbrodt R, Rabsch W, Ketley JM, Tsolis RM, Everest P, Dougan G,  
954 Bäumler AJ, Roberts M, Williams PH. 1999. Ferrioxamine-mediated Iron(III) utilization  
955 by *Salmonella enterica*. *Appl Environ Microbiol* 65:1610-8.
- 956 64. de Lorenzo V, Cases I, Herrero M, Timmis KN. 1993. Early and late responses of TOL  
957 promoters to pathway inducers: identification of postexponential promoters in  
958 *Pseudomonas putida* with *lacZ-tet* bicistronic reporters. *J Bacteriol* 175:6902-7.
- 959 65. Lopez CA, Winter SE, Rivera-Chávez F, Xavier MN, Poon V, Nuccio SP, Tsolis RM,  
960 Bäumler AJ. 2012. Phage-mediated acquisition of a type III secreted effector protein  
961 boosts growth of *Salmonella* by nitrate respiration. *MBio* 3.
- 962 66. Wang RF, Kushner SR. 1991. Construction of versatile low-copy-number vectors for  
963 cloning, sequencing and gene expression in *Escherichia coli*. *Gene* 100:195-9.
- 964 67. Guzman LM, Belin D, Carson MJ, Beckwith J. 1995. Tight regulation, modulation, and  
965 high-level expression by vectors containing the arabinose P<sub>BAD</sub> promoter. *J Bacteriol*  
966 177:4121-30.
- 967 68. Amann E, Ochs B, Abel KJ. 1988. Tightly regulated *tac* promoter vectors useful for the  
968 expression of unfused and fused proteins in *Escherichia coli*. *Gene* 69:301-15.
- 969 69. Hashimoto-Gotoh T, Yamaguchi M, Yasojima K, Tsujimura A, Wakabayashi Y,  
970 Watanabe Y. 2000. A set of temperature sensitive-replication/-segregation and  
971 temperature resistant plasmid vectors with different copy numbers and in an isogenic  
972 background (chloramphenicol, kanamycin, *lacZ*, *repA*, *par*, *polA*). *Gene* 241:185-91.
- 973 70. Delaglio F, Grzesiek S, Vuister GW, Zhu G, Pfeifer J, Bax A. 1995. NMRPipe: a  
974 multidimensional spectral processing system based on UNIX pipes. *J Biomol NMR*  
975 6:277-93.
- 976 71. Johnson BA, Blevins RA. 1994. NMR View: A computer program for the visualization  
977 and analysis of NMR data. *J Biomol NMR* 4:603-14.
- 978 72. Otwinowski Z, Minor W. 1997. Processing of X-ray diffraction data collected in  
979 oscillation mode. *Macromolecular Crystallography, Pt a* 276:307-326.
- 980 73. Vagin A, Teplyakov A. 1997. *MOLREP*: an automated program for molecular  
981 replacement. *J Appl Cryst* 30:1022-1025.
- 982 74. Schwede T, Kopp J, Guex N, Peitsch MC. 2003. SWISS-MODEL: An automated protein  
983 homology-modeling server. *Nucleic Acids Res* 31:3381-5.
- 984 75. Lunin V, Evdokimova E, Kudritska M, Osipiuk J, Joachimiak A, Edwards A, Savchenko  
985 A. 2005. The crystal structure of transcriptional regulator PA3341. Midwest Center for  
986 Structural Genomics, RCSB PDB.
- 987 76. Murshudov GN, Vagin AA, Dodson EJ. 1997. Refinement of macromolecular structures  
988 by the maximum-likelihood method. *Acta Crystallogr D Biol Crystallogr* 53:240-55.
- 989 77. Collaborative Computational Project Nm. 1994. The CCP4 suite: programs for protein  
990 crystallography. *Acta Crystallogr D Biol Crystallogr* 50:760-3.
- 991 78. Brünger AT. 1993. Assessment of phase accuracy by cross validation: the free R value.  
992 Methods and applications. *Acta Crystallogr D Biol Crystallogr* 49:24-36.
- 993 79. McRee DE. 1999. XtalView/Xfit--A versatile program for manipulating atomic  
994 coordinates and electron density. *J Struct Biol* 125:156-65.
- 995 80. Emsley P, Cowtan K. 2004. Coot: model-building tools for molecular graphics. *Acta*  
996 *Crystallogr D Biol Crystallogr* 60:2126-32.
- 997 81. Read RJ. 1986. Improved Fourier coefficients for maps using phases from partial  
998 structures with errors. *Acta Cryst A* 42:140-149.

- 999 82. Kraulis P. 1991. MOLSCRIPT: a program to produce both detailed and schematic plots  
1000 of protein structures. *J Appl Cryst* 24:946-950.
- 1001 83. Merritt EA, Bacon DJ. 1997. Raster3D: photorealistic molecular graphics. *Methods*  
1002 *Enzymol* 277:505-24.
- 1003 84. Aparicio O, Geisberg JV, Sekinger E, Yang A, Moqtaderi Z, Struhl K. 2005. Chromatin  
1004 immunoprecipitation for determining the association of proteins with specific genomic  
1005 sequences *in vivo*. *Curr Protoc Mol Biol* Chapter 21:Unit 21.3.
- 1006 85. Le SQ, Gascuel O. 2008. An improved general amino acid replacement matrix. *Mol Biol*  
1007 *Evol* 25:1307-20.
- 1008 86. Kumar S, Stecher G, Li M, Knyaz C, Tamura K. 2018. MEGA X: Molecular  
1009 evolutionary genetics analysis across computing platforms. *Mol Biol Evol* 35:1547-1549.
- 1010
